# Supplementary material for: Development of a clinical pharmacy model within an Australian home nursing service using co-creation and participatory action research: the Visiting Pharmacist (ViP) study
Source: PubMed Central journal article supplement — BMJ Open. 2017 Nov 3;7(11):e018722. doi: 10.1136/bmjopen-2017-018722 (PMC5722093; doi:10.1136/bmjopen-2017-018722), 2017-11-03
Supplement: bmjopen-2017-018722.draft_revisions.pdf [file bmjopen-2017-018722.draft_revisions.pdf]

# BMJ Open

BMJ Open is committed to open peer review. As part of this commitment we make the peer review history of every article we publish publicly available.

When an article is published we post the peer reviewers' comments and the authors' responses online. We also post the versions of the paper that were used during peer review. These are the versions that the peer review comments apply to.

The versions of the paper that follow are the versions that were submitted during the peer review process. They are not the versions of record or the final published versions. They should not be cited or distributed as the published version of this manuscript.

BMJ Open is an open access journal and the full, final, typeset and author-corrected version of record of the manuscript is available on our site with no access controls, subscription charges or pay-per-view fees (<http://bmjopen.bmj.com>).

If you have any questions on BMJ Open's open peer review process please email [editorial.bmjopen@bmj.com](mailto:editorial.bmjopen@bmj.com)

# BMJ Open

## Development of a clinical pharmacy model within a home nursing service using co-creation and participatory action research: the Visiting Pharmacist (ViP) project

|                                 |                                                                                                                                                                                                                                                                                                                                                                                                                                                                                                                                                                                                                                                                                                                                          |
|---------------------------------|------------------------------------------------------------------------------------------------------------------------------------------------------------------------------------------------------------------------------------------------------------------------------------------------------------------------------------------------------------------------------------------------------------------------------------------------------------------------------------------------------------------------------------------------------------------------------------------------------------------------------------------------------------------------------------------------------------------------------------------|
| Journal:                        | <i>BMJ Open</i>                                                                                                                                                                                                                                                                                                                                                                                                                                                                                                                                                                                                                                                                                                                          |
| Manuscript ID                   | bmjopen-2017-018722                                                                                                                                                                                                                                                                                                                                                                                                                                                                                                                                                                                                                                                                                                                      |
| Article Type:                   | Research                                                                                                                                                                                                                                                                                                                                                                                                                                                                                                                                                                                                                                                                                                                                 |
| Date Submitted by the Author:   | 18-Jul-2017                                                                                                                                                                                                                                                                                                                                                                                                                                                                                                                                                                                                                                                                                                                              |
| Complete List of Authors:       | Elliott, Rohan; Austin Health, Pharmacy Department; Royal District Nursing Service RDNS Institute, Monash University Centre for Medicine Use and Safety<br>Lee, Cik Yin; Royal District Nursing Service, RDNS Institute; Monash University Centre for Medicine Use and Safety, The University of Melbourne Department of Nursing,<br>Beanland, Christine; Royal District Nursing Service, RDNS Institute<br>Goeman, Dianne; Royal District Nursing Service, RDNS Institute; Monash University, Central Clinical School<br>Petrie, Neil; PRN Consulting<br>Petrie, Barbara ; PRN Consulting<br>Vise, Felicity; Royal District Nursing Service, RDNS Clinical Service<br>Gray, June; Royal District Nursing Service, RDNS Clinical Service |
| <b>Primary Subject Heading</b>: | Patient-centred medicine                                                                                                                                                                                                                                                                                                                                                                                                                                                                                                                                                                                                                                                                                                                 |
| Secondary Subject Heading:      | Health services research, Evidence based practice, Pharmacology and therapeutics, Nursing, General practice / Family practice                                                                                                                                                                                                                                                                                                                                                                                                                                                                                                                                                                                                            |
| Keywords:                       | co-creation and participatory action research, medication management, older people, home nursing or home care, medication review, clinical pharmacy                                                                                                                                                                                                                                                                                                                                                                                                                                                                                                                                                                                      |
|                                 |                                                                                                                                                                                                                                                                                                                                                                                                                                                                                                                                                                                                                                                                                                                                          |

SCHOLARONE™  
Manuscripts

**TITLE**

Development of a clinical pharmacy model within a home nursing service using co-creation and participatory action research: the Visiting Pharmacist (ViP) project

**AUTHORS**

Rohan A Elliott,<sup>1,2,3</sup> Cik Yin Lee,<sup>1,3,4</sup> Christine Beanland,<sup>1</sup> Dianne Goeman,<sup>1,5</sup> Neil Petrie,<sup>6</sup> Barbara Petrie,<sup>6</sup> Felicity Vise,<sup>7</sup> June Gray<sup>7</sup>

**AFFILIATIONS AND ADDRESSES**

<sup>1</sup> RDNS Institute, Royal District Nursing Service, St Kilda, VIC, Australia

<sup>2</sup> Pharmacy Department, Austin Health, Heidelberg, VIC, Australia

<sup>3</sup> Centre for Medicine Use and Safety, Monash University, Parkville, VIC, Australia

<sup>4</sup> Department of Nursing, The University of Melbourne, Melbourne, VIC, Australia

<sup>5</sup> Central Clinical School, Monash University, Melbourne, VIC, Australia

<sup>6</sup> PRN Consulting, Melbourne, VIC, Australia

<sup>7</sup> RDNS Clinical Service, Royal District Nursing Service, Melbourne, VIC, Australia

**CORRESPONDING AUTHOR**

Rohan A Elliott

Pharmacy Department, Austin Health

300 Waterdale Rd, Heidelberg West, VICTORIA 3081, Australia

Email: [rohan.elliott@austin.org.au](mailto:rohan.elliott@austin.org.au)

Telephone: +61(3) 9496 2334

## ABSTRACT

### Objective

To develop a collaborative, person-centred model of clinical pharmacy support for community nurses and their medication management clients.

### Design

Co-creation and participatory action research, based on reflection, data collection, interaction and feedback from participants and other stakeholders.

### Setting

A large, non-profit home nursing service in Melbourne, Australia.

### Participants

Older people referred to the home nursing service for medication management support, their carers, community nurses, general practitioners (GPs) and pharmacists, a multidisciplinary stakeholder reference group (including consumer representation) and the project team.

### Data collection and analysis

Feedback and reflections from minutes, notes and interview transcripts from: project team meetings, clinical pharmacists' reflective diaries and interviews, meetings with community nurses, multidisciplinary stakeholder reference group meetings and in-depth interviews and focus groups with 27 older people, 18 carers, 53 nurses, 15 GPs, 7 community pharmacists.

### Results

The model was based on best-practice medication management standards and designed to address key medication management issues raised by stakeholders. Pharmacist roles included direct client care and indirect care. Direct care included home visits, medication reconciliation, medication review, medication regimen simplification, preparation of medication lists or charts for clients and nurses, liaison and information sharing with prescribers and pharmacies and patient/carer education. Indirect care included providing

1  
2  
3 medicines information and education for nurses and assisting with review and  
4  
5 implementation of organisational medication policies and procedures. The model allowed  
6  
7 nurses to refer directly to the pharmacist, enabling timely resolution of medication issues.  
8  
9 Direct care was provided to 84 older people over a 15-month implementation period.  
10  
11 Ongoing feedback and consultation throughout the implementation enabled the model to be  
12  
13 refined, enablers identified and challenges addressed.  
14  
15

## 16 **Conclusions**

17  
18 A collaborative, person-centred clinical pharmacy model that addressed the needs of clients,  
19  
20 carers, nurses and other stakeholders was successfully developed. The model is likely to have  
21  
22 applicability to home nursing services nationally and internationally.  
23  
24  
25  
26

## 27 **ARTICLE SUMMARY**

### 28 **Strengths and limitations of this study**

- 29  
30  
31
- 32 • A co-design and participatory research approach, incorporating extensive and  
33 repeated consultation and feedback from home nursing clients, carers, nurses, general  
34 practitioners, pharmacists and other experts, was used to develop a model of clinical  
35 pharmacy support that addressed the needs of the home nursing service and its clients.  
36  
37
  - 38 • Best practice standards and guidelines for medication management and clinical  
39 pharmacy services were used to underpin development of the model.  
40  
41
  - 42 • The model was developed within a single, metropolitan, home nursing service, so  
43 further work is needed to determine its generalisability to other services and in  
44 particular to rural services.  
45  
46
  - 47 • While feedback indicated that the model met stakeholders' needs, further studies  
48 should assess the impact on client outcomes and cost-effectiveness of the model.  
49  
50  
51  
52  
53  
54  
55  
56  
57  
58  
59  
60

1  
2  
3 **Acknowledgements** The authors thank all of the participants who contributed to the  
4 development and implementation of the model, including home nursing clients and their  
5 carers, community nurses and their managers, GPs, community pharmacists and reference  
6 group members. We also thank the charitable trusts (listed below) who helped fund the study,  
7 and the following people who assisted with the study: Susan Koch, Nevola Templestone, Julie  
8 Curtis, Justine Norling and Julie Murphy.  
9  
10  
11  
12

13  
14 **Author contributions** RAE and CB conceived, initiated and led the study. CYL project  
15 managed the study and collected data with assistance from all authors. RAE and CB led the  
16 development of the model, with input from all authors. All authors contributed to  
17 implementation of the model. CYL, RAE, CB and DG analysed the data with input from all  
18 authors. RAE and CYL prepared the manuscript. All authors reviewed and approved the  
19 manuscript.  
20  
21  
22  
23  
24

25  
26 **Funding** This work was supported by grants from the Ian Rollo Currie Estate, Lynne Quayle  
27 Charitable Trust and RDNS Trust. The funders had no role in the design or conduct of the  
28 study, data collection, management, analysis and interpretation, or preparation, review or  
29 approval of the manuscript.  
30  
31  
32  
33

34 **Competing interests** The authors have no conflicts of interest that are relevant to the content  
35 of this article.  
36  
37  
38

39 **Ethics approval** This study was approved by the Royal District Nursing Service Research  
40 Ethics Committee and the Monash University Human Research Ethics Committee.  
41  
42  
43

44 **Data sharing statement** Individual participant data for this study will not be available for  
45 sharing due to the requirements imposed by ethics. Other study materials such as protocols  
46 relating to the study implementation and evaluation will be shared upon request from the  
47 authors.  
48  
49  
50  
51  
52  
53  
54  
55  
56  
57  
58  
59  
60

## BACKGROUND

Home nursing services provide nursing and personal care to people in their own homes. A common reason for nursing support is to assist with medication management when a person is unable to manage their medicines independently, due to declining health or cognitive function.

People who receive medication management support from home nursing services are a group who are at significant risk of adverse medication events (AMEs).<sup>1-4</sup> They are typically older, frail, with multiple health problems and multiple medicines.<sup>1-4</sup> Often they have been recently hospitalised. They are frequently prescribed potentially inappropriate or high-risk medicines and experience a high rate of medication errors.<sup>1-4</sup>

The risk of medication errors in the home care setting may be greater than in hospitals and nursing homes because of the unstructured environment and barriers to interdisciplinary communication and teamwork.<sup>5</sup> For example, community nurses usually have no formal relationship and limited contact with clients' medical practitioners and pharmacies. There may be multiple prescribers and multiple pharmacies involved in the client's care. Prescribers and pharmacists may not see the client regularly, and it can be challenging for nurses to obtain and maintain accurate medication treatment authorisations (medication administration charts or other medication lists signed by a medical practitioner authorising the nurse to administer medicines or assist with medicine administration).<sup>1</sup> Clients (or their informal carers) may continue to administer some medicines or doses independently (e.g. between nurse visits).

Despite medicines management being a major component of home care business, and despite the high risk of medication errors and AMEs, home nursing providers usually do not employ pharmacists.<sup>1-6-7</sup> Clients do not routinely receive comprehensive medication reconciliation and review on admission to identify medication errors and potentially inappropriate or unnecessary medicines, or to simplify complex medication regimens.

Pharmacists can make a significant contribution to medication safety.<sup>8</sup> There is evidence that clinical pharmacy services can reduce medication-related problems, polypharmacy and

1  
2  
3 AMEs, and may be cost-effective.<sup>9-14</sup> However, pharmacists are under-utilised in the home  
4 care setting. In Australia, although there is a government-funded medication review program  
5 for community-living people who are at risk of AMEs (the 'Home Medicines Review'  
6 [HMR] program),<sup>15</sup> there are a number of structural, professional and patient barriers that  
7 have resulted in poor uptake of HMRs.<sup>13 16</sup> Despite efforts over many years to increase HMR  
8 rates, including specifically in home nursing clients, uptake among high-risk individuals  
9 remains low.<sup>1 17-20</sup>

10  
11  
12  
13  
14  
15  
16 The aim of this study was to develop a collaborative, person-centered model of clinical  
17 pharmacy support for nurses and clients of a home nursing service in order to improve access  
18 to clinical pharmacy services, enhance interdisciplinary teamwork and help address problems  
19 with medication management and medication safety.  
20  
21  
22

## 23 24 25 **METHODS**

### 26 27 28 **Setting**

29  
30  
31 The clinical pharmacy model was developed at a large, non-profit home nursing service in  
32 Melbourne, Australia between 2013 and 2015. As part of the development process, it was  
33 implemented at two sites within the organisation between September 2014 and December  
34 2015. The sites employed 103 nurses who provided care to 2,534 clients, of whom 1,089  
35 (43%) received medication management support.  
36  
37  
38  
39

### 40 41 42 **Study design**

#### 43 44 45 *Theoretical study framework*

46  
47  
48 The study used a co-creation and participatory action research (PAR) approach to design,  
49 implement and refine the clinical pharmacy service model. Co-creation and PAR are  
50 approaches to research that include the active involvement of relevant stakeholders, including  
51 consumers, in order to understand their world and ensure that research outcomes are  
52 appropriate to identified needs.<sup>21 22</sup>  
53  
54  
55  
56  
57  
58  
59  
60



1  
2  
3 Problems with existing community-based medication management, together with the need to  
4 design healthcare systems around patients' and health professionals' needs, influenced the  
5 choice to use a co-creation and PAR approach. The approach involved interaction and  
6 consultation with, and reflections from, participants and stakeholders before, during and after  
7 development of the model, along with prospective collection of data regarding uptake and  
8 implementation of the model.  
9  
10  
11  
12

13  
14 The co-creation and PAR approach engaged stakeholders in design and implementation. It  
15 allowed the model to be responsive to the clinical environment, to ensure it would be useful,  
16 sustainable and transferrable.  
17  
18  
19

### 20 21 ***Framework for development of the model*** 22

23  
24 In addition to focusing on stakeholders' needs, development of the model took learnings from  
25 well-established, successful clinical pharmacy models in hospital and residential aged care  
26 settings. Components of the model were based on Australian standards of practice for clinical  
27 pharmacy, which define evidence-based clinical pharmacy activities that constitute best  
28 practice medication management. These include: medication reconciliation, medication  
29 review, input into medication care plans and provision of medicines information.<sup>23</sup> Australian  
30 guidelines for medication management in community settings and the Chronic Care Model  
31 were also used to guide aspects of the model.<sup>24 25</sup> The Chronic Care Model is a well-  
32 established, evidence-based framework for chronic care management and practice  
33 improvement that advocates a collaborative, person-centred approach to improve chronic  
34 disease management.<sup>25</sup>  
35  
36  
37  
38  
39  
40  
41  
42  
43

44 The specific roles and methods of delivery were modified for the home nursing setting, based  
45 on stakeholders' input and feedback.  
46  
47  
48

### 49 **Participants** 50

51  
52 Eight health professionals and researchers with extensive experience in aged care and  
53 medication management led the development and implementation of the model (a community  
54 nurse/academic, a clinical pharmacist/academic, a community pharmacist/academic, two  
55 nurse managers and a sociologist). A purposively selected multidisciplinary stakeholder  
56  
57  
58  
59  
60

1  
2  
3 reference group was established that included: practising nurses, pharmacists and GPs,  
4 consumer and ethnic community advocates, community aged care and community nursing  
5 managers, government health department representatives and representatives from nursing  
6 and pharmacy professional societies. Two experienced consultant clinical pharmacists were  
7 employed (12 hours/week each) during the implementation phase. Other key participants  
8 were: older people referred to the home nursing service for medication management support,  
9 their carers (where relevant) and their community nurses, general practitioners (GPs) and  
10 community pharmacies.

11  
12 To facilitate co-design and refinement of the model, in-depth interviews and focus groups  
13 were conducted with convenience samples of clients, carers, nurses, GPs, community  
14 pharmacists and consultant pharmacists before, during and after implementation of the  
15 model. They were recruited from the older people and carers who had received medication  
16 management support from the home nursing service and health professionals who cared for  
17 people receiving medication management support. People with cognitive impairment or poor  
18 literacy in English were not excluded. Professional interpreters were used for non-English  
19 speaking older people /carers.

### 20 21 22 23 24 25 26 27 28 29 30 31 32 33 **Data collection and analysis**

34  
35  
36 Multiple data sources were used to inform the co-design, implementation and refinement of  
37 the model and describe outcomes of the development process:

- 38 • minutes from project team meetings (n=30);
  - 39 • minutes from stakeholder reference group meetings (n=5);
  - 40 • audit of medication management client records (n=100);<sup>1</sup>
  - 41 • in-depth interviews and focus groups before, during and after implementation with  
42 older people (n=27), carers (n=18), community nurses (n=53), GPs (n=15),  
43 community pharmacists (n=7) and consultant pharmacists (n=2);
  - 44 • notes from consultant clinical pharmacists' reflective diaries (n=2) and debrief  
45 meetings with the project team (n=4);
  - 46 • case notes summarising individual clients' participation in the model and reasons for  
47 nurses' referral (n=84);
  - 48 • notes from community nurses' clinical meetings (n=15); and
- 49  
50  
51  
52  
53  
54  
55  
56  
57  
58  
59  
60

- records of direct communication (e.g. email) to the research team from nurses and pharmacists (which was encouraged as a means of providing rapid feedback and resolution of issues during implementation).

At some meetings, case notes for selected clients (de-identified) were presented to generate discussion about the model, including success factors, enablers and challenges.

Data from these sources were used to identify issues and gaps in medication management processes, review functions, incorporate evidence-based strategies/approaches in the model, and continuously evaluate the model with respect to stakeholder acceptance and feedback, and ability of the model to address key issues and gaps in care. Detailed analysis of interview and focus group data and outcomes of pharmacist medication reviews is beyond the scope of this paper and will be reported elsewhere.

## RESULTS

Stakeholder consultation and audit of medication management client records highlighted key issues that the model needed to address (**Table 1**). These issues helped inform development of the Visiting Pharmacist (ViP) model for home nursing clients. Ongoing feedback and consultation throughout the project enabled the model, and pharmacist roles, to be refined over time.

### The clinical pharmacy model

Pharmacist roles identified throughout the project were broadly classified into direct client care and indirect client care (**Table 2**). Indirect care included activities that were not related to a specific patient and would be expected to improve medication management across a number of clients or the whole organisation. Direct care was any activity addressing the needs of a specific client. Most commonly this involved one or more home visits, medication reconciliation and comprehensive medication review, however there were occasions when client-specific issues were able to be addressed without a home visit.

### *Communication between the pharmacists and community nurses*

A challenge to the translation of hospital and residential care clinical pharmacy models to the home nursing setting was that community nurses are on the road visiting clients most of the time, and dispersed over a broad geographical area. Nurses were able to telephone the pharmacist if they had urgent questions about medication management. Non-urgent communication was through electronic messaging (secure organisational email network or documentation in clients' clinical records). Face-to-face contact was achieved through joint pharmacist-nurse client home visits and pharmacist attendance at nurses' clinical meetings.

### *Referrals for direct client care*

The model enabled nurses to refer clients directly to the clinical pharmacist if the client had one or more medication-related risk-factors or problems (**Table 3**), or if the nurse had any other concerns about the client's medication management. Education, a written protocol and a referral form were provided to nurses to help them identify and refer suitable clients.

After obtaining verbal consent from the client or their carer, nurses completed a referral form and sent it to the clinical pharmacist via secure email. The form included client details, reason(s) for referral (free-text) and medication-related risk-factors or problems (tick-box) (**Table 3**). A letter was sent to the client's GP and community pharmacy notifying them that the referral had been made and informing them that they would receive verbal and/or written communication from the clinical pharmacist.

### *Medication review process*

Prior to visiting the client's home, the pharmacist reviewed referral documents, collated information on the client's medicines use, and liaised with the community nurse and client/carer for a time to visit the client. Pharmacist home visits were usually conducted with the community nurse, to enable the nurse to introduce the pharmacist and participate in the discussion, however nurses usually did not stay for the entire pharmacist consultation. The pharmacist obtained a best-possible medication history (medication history confirmed using two or more sources), performed medication reconciliation, reviewed the way medicines

1  
2  
3 were stored and used, reviewed the indication for each medicine to determine ongoing need  
4 and appropriateness, checked clients' administration technique if they were self-  
5 administering any medicines, provided education and answered questions.  
6  
7  
8

9  
10 Following the home visit, the pharmacist prepared a report that included an accurate  
11 medicines list, medication review findings and recommendations to address medication-  
12 related issues. The report was sent to the client's GP, community pharmacy, and community  
13 nurse. Where relevant it was also sent to other prescribers (e.g. specialist physicians). A  
14 patient copy of the medicines list was provided to the client and/or carer if appropriate.  
15  
16  
17

18  
19 If the nurses' medication treatment authorisation was not accurate, or there were medication  
20 changes as a result of the medication review, the pharmacist asked the GP to provide a new  
21 treatment authorisation or to sign the pharmacist-prepared list to enable it to be used as a  
22 treatment authorisation.  
23  
24  
25  
26

#### 27 28 *Follow-up after medication review*

29  
30  
31 The pharmacist followed-up the report with telephone conversations with the client's GP,  
32 specialists and community pharmacist when necessary, to discuss issues and  
33 recommendations and ensure an updated, accurate treatment authorisation was provided to  
34 the community nurse. Where necessary the pharmacist provided follow-up to the client and  
35 carer, either by phone or with a second home visit.  
36  
37  
38  
39

40  
41 Outcomes and medication changes were communicated to all parties involved in the client's  
42 medication management to ensure everyone was working from the same medication list, and  
43 that any medication changes made by the GP were implemented by the community pharmacy  
44 and home nursing service.  
45  
46  
47  
48

#### 49 50 **Medication review referral and uptake**

51  
52  
53 Over the 15-month implementation period, 43 community nurses referred 96 medication  
54 management clients to the clinical pharmacy service. Eight-four (88%) referred clients (or  
55 their carer) received a pharmacist review. Their median age was 85.5 years (interquartile  
56 range [IQR] 77-89) and they used a median of 13 medicines (IQR 10-17). They had 74 GPs  
57  
58  
59  
60

1  
2  
3 (from 56 different clinics) and used 49 different community pharmacies. Twenty-nine  
4 (34.5%) clients had medicines prescribed by one or more medical specialist(s) in addition to  
5 their GP.  
6  
7

8  
9  
10 The most common reasons for pharmacist referral specified by nurses on referral forms were  
11 to simplify complex medication regimens (35/84; 42%) and concerns about inaccurate,  
12 incomplete or multiple medication treatment authorisations (18/84; 22%).  
13  
14

15  
16 On average, the clinical pharmacists spent a median of 4.8 hours (IQR 3.6–6.6; range  
17 2.0–11.3 hours) per referred client. This included the home visit(s), preparation of medication  
18 lists and medication review reports, and follow up with clients, carers, prescribers,  
19 pharmacies and nurses to ensure issues were addressed. It excludes travel time for client  
20 home visits (median 39 minutes per client, IQR 20-70, range 10-150). The pharmacists spent  
21 an average of 1.0 hour per week providing indirect care.  
22  
23  
24  
25  
26

### 27 28 **Pharmacist competencies**

29  
30  
31 Feedback from participants identified that the pharmacists required excellent interpersonal,  
32 listening, advocacy and communication skills, the ability to build trusting professional  
33 relationships and work effectively as a team, excellent assessment abilities, in-depth  
34 knowledge of pharmacology and medication management for older people, and strong  
35 leadership skills in order to provide person-centred care that met the needs of clients/carers,  
36 nurses, GPs and community pharmacies.  
37  
38  
39  
40  
41  
42

### 43 **Organisational support and resources**

44  
45  
46 Resources required to support the implementation of the clinical pharmacy model included  
47 access to office space, a mobile telephone, a fax machine, a computer with access to a range  
48 of medicines information resources, and a dedicated vehicle. The pharmacist also needed  
49 remote electronic access to clients' home nursing records, including correspondence from  
50 external providers such as GPs and hospitals, and ability to communicate securely by email  
51 with community nurses. Access to interpreters was also important.  
52  
53  
54  
55  
56  
57  
58  
59  
60

## Stakeholder feedback

Feedback from clients, carers, community nurses, GPs and community pharmacists indicated the model was well accepted and addressed gaps in existing medication management processes. The model improved access to clinical pharmacist consultations and medication review by enabling nurses to obtain client consent and directly initiate a review instead of having to ask the GP to organise a HMR (Table 4).

Nurses reported that the clinical pharmacy model was able to address medication-related issues that frequently impacted on their ability to provide safe, high quality care, such as inaccurate or confusing treatment authorisations, complex medication regimens requiring multiple daily visits, and uncertainty regarding appropriateness of medicines and risk of adverse effects. They felt the pharmacists saved them time and sometimes reduced the number of daily nurse visits required by clients, by clarifying confusing and conflicting medication lists, simplifying medication regimens or changing dose-times and organising updated medication treatment authorisations.

Under the existing Australian HMR model community nurses are usually not made aware when a medication review is being conducted, nor consulted to obtain their insights into the clients' medication management and medication-related problems or to ascertain what issues or questions the nurses have with the client's medicines management. Nurses also do not receive a copy of the medication review report or an updated medicines list (Table 4). Nurses felt more engaged with the medication review process in the ViP model and felt they benefited more from it. They commented that the pharmacist was a valuable resource for them and their clients. They noted that they learnt a lot from doing joint visits with the pharmacist, and that the pharmacist had become a valuable member of the medication management team.

Most GPs were happy for a pharmacist medication review to be organised by the community nurse. They felt the model was a good way of ensuring that this high-risk client group received a review, noting that the more complex and time-consuming HMR process was a barrier for them otherwise making pharmacist referrals. However, a minority of GPs indicated they would have preferred to organise an HMR for the client.

1  
2  
3  
4  
5 GPs were usually willing to engage with the pharmacist to address medication-related  
6 problems and to review and sign the pharmacist-prepared medication list (to enable it to be  
7 used as a medication treatment authorisation by the community nurses) or provide an  
8 alternative updated and signed list. However, some GPs were less cooperative, and the  
9 pharmacists reported spending considerable time trying to follow-up medication issues with  
10 some GPs. This variable level of engagement, however, was not unique to the pharmacists, as  
11 community nurses reported that they also regularly experienced the same. Nurses who  
12 participated in the ViP model felt that the GPs were more willing to engage with the  
13 pharmacist than with them about medication issues, and saw this as another benefit of the  
14 model.  
15  
16  
17  
18  
19  
20  
21

22  
23 Clients and carers reported that the pharmacist visit provided an opportunity for them to ask  
24 questions and increased their understanding of their medicines. Some reported that their  
25 medication regimen was simplified, saving them money and, sometimes, reducing the need  
26 for nurse visits by making it easier for them to take medicines independently. Some clients  
27 were not able to identify specific benefits, but were happy to receive the pharmacist service if  
28 it helped their nurses or doctors.  
29  
30  
31  
32  
33

34  
35 All stakeholders reported that a valuable aspect of the pharmacist's role was facilitating  
36 information-sharing and improving teamwork among members of the medication  
37 management team. The follow-up and ongoing support provided by the pharmacist, including  
38 repeat home visits if required, were considered by all stakeholder to be a strength of the  
39 model, as this enabled the pharmacist to assist with implementing changes to clients'  
40 medication regimens and medication management care plans, and helped ensure medication  
41 issues were resolved. This contrasts with the HMR model, in which lack of follow-up by the  
42 reviewing pharmacist was noted by stakeholders as a major limitation, resulting in  
43 medication-related issues not always being resolved (**Table 4**).  
44  
45  
46  
47  
48  
49  
50

### 51 **Enablers and challenges**

52  
53

54  
55 A number of factors helped make development and implementation of the model a success.  
56 Stakeholder consultation and the use of co-design and PAR principles ensured stakeholders  
57 had input into, and ownership of, the model. The high level of support for the role from  
58  
59  
60



1  
2  
3 nurses and nurse managers, and their willingness to accept the pharmacist as a member of  
4 their team and facilitate the pharmacists' role contributed to its success. The appointment of  
5 two experienced pharmacists to the role, who were able to work with the project team and the  
6 nurses and other health professionals to develop the role and manage challenges, was also a  
7 success factor.  
8  
9  
10

11  
12  
13 A challenge for the model was engaging GPs. As community nursing clients retain their usual  
14 GP, the consultant clinical pharmacists had to work with many different GPs. It was not  
15 possible to consult all GPs prior to implementing the model, so the pharmacists had to engage  
16 with a new GP almost every time they reviewed a client. The willingness of GPs to engage  
17 with the pharmacist varied. Over time, as the model becomes more established, and GPs  
18 become familiar with the service, this may become less of an issue.  
19  
20  
21  
22  
23

24  
25 A factor that may have impacted on GPs' willingness to engage was the absence of  
26 remuneration for time they spent reading medication review reports, taking phone calls from  
27 the pharmacist to discuss medication issues and reviewing/preparing/signing medication  
28 treatment authorisations. GPs could only receive payment if they had a formal consultation  
29 with the patient. This, however, is similar to what happens for home nursing clients outside of  
30 the ViP model, when GPs still need to provide community nurses with medication treatment  
31 authorities (and update them when there are medication changes) and address concerns or  
32 questions raised by nurses about their clients.  
33  
34  
35  
36  
37  
38

39  
40 The main challenge to the sustainability of the model is the absence of a specific funding  
41 source for clinical pharmacy support within the home nursing sector. The Australian  
42 government's HMR program rules preclude its use for this type of model, so funding will  
43 need to come from other sources such as home and community care programs and the  
44 organisations providing home care.  
45  
46  
47  
48

## 49 **DISCUSSION**

50  
51  
52  
53 This study describes the successful development of a collaborative, person-centred model of  
54 clinical pharmacy support for nurses and clients of a home nursing service that incorporates  
55 direct client care and indirect care (nurse support). The model targeted a group of  
56  
57  
58  
59  
60

1  
2  
3 community-dwelling older people known to be at high risk of medication-related problems  
4 and to have poor access to clinical pharmacy support.<sup>1 17</sup> The success of the model was  
5 demonstrated by high levels of acceptance and uptake of the pharmacists' role and its ability  
6 to meet stakeholders' needs.  
7  
8

9  
10  
11 A major strength of the study was the extensive stakeholder consultation, inclusion of  
12 consumers and other stakeholders in the co-creation of the model, and use of PAR to develop  
13 and refine the model. A weakness was that the model was developed and implemented within  
14 a single home nursing service, albeit one of the largest in Australia, so further work is needed  
15 to determine its generalisability to other services, and in particular to rural services.  
16  
17  
18

19  
20  
21 Whilst there have been many previous studies describing pharmacist medication reviews in  
22 domiciliary or primary care settings,<sup>26</sup> this is the first that we know of that describes the  
23 development of a comprehensive clinical pharmacy model specifically for home nursing  
24 clients. The model differs from traditional domiciliary pharmacist models because it doesn't  
25 only focus on medication review. Instead it includes a range of clinical pharmacy roles,  
26 under-pinned by best-practice guidelines and standards, including direct client care and  
27 indirect care to address the specific needs of community nurses and their clients. Functionally  
28 the model has similarities with hospital 'ward pharmacist' models and nursing home  
29 consultant pharmacist models, in that a designated pharmacist delivers a range of clinical  
30 pharmacy and medication safety functions to support the service and its patients or clients.  
31  
32  
33  
34  
35  
36  
37  
38

39  
40 The only related community-based models we identified in the published literature were  
41 pharmacist services delivered within home healthcare services in the USA,<sup>7 27 28</sup> and a  
42 domiciliary pharmacy service provided by a community health and social care service in the  
43 UK.<sup>29</sup> In the USA, Redit et al described a home healthcare pharmacist role that included a  
44 pharmacist home visit, medication reconciliation and medication review. Patients who  
45 received a pharmacist review were less likely to have a hospital admission or emergency  
46 room visit.<sup>28</sup> In the UK, Dilks et al described a visiting pharmacist service for complex older  
47 people who were often housebound.<sup>29</sup> An evaluation of the service suggested that it could  
48 reduce unplanned hospital admissions and was likely to be cost-saving.<sup>29</sup> Some of the  
49 pharmacist roles in these studies were similar to our model, but no information was provided  
50 regarding the framework or processes used to develop these models, nor the extent to which  
51  
52  
53  
54  
55  
56  
57  
58  
59  
60

1  
2  
3 the pharmacists liaised with community nurses or whether the model included indirect care to  
4 support the work of community nurses.  
5  
6

7  
8 Given the ageing population, increasing polypharmacy and complexity of medication  
9 management, increasing prevalence of AMEs in the primary care setting,<sup>30</sup> and increasing  
10 demand for home care support to delay the need for residential aged care, our model is likely  
11 to have applicability to home nursing services nationally and internationally.  
12  
13

14  
15  
16 The model has potential to reduce the risk of AMEs, however further research is needed to  
17 confirm its impact on client outcomes. Preliminary evidence suggests the model could be  
18 cost-saving to the health system, with a Return on Investment analysis, conducted by a health  
19 economist using data from the ViP pilot study together with published data on rates of AME  
20 and medication review outcomes, indicating that \$1.54 could be saved for every \$1 spent on  
21 the ViP model.<sup>31</sup> Savings were from reduced medication use, GP visits/consultations,  
22 hospitalisations and nurse visits. Further work is required to confirm the model is cost-  
23 effective and identify a sustainable funding model.  
24  
25  
26  
27  
28  
29

### 30 31 **Conclusion** 32

33  
34 A collaborative, person-centred clinical pharmacy model in the home nursing setting that  
35 addressed the needs of clients, carers, nurses and other stakeholders was developed and is  
36 likely to have applicability to community nursing services nationally and internationally.  
37  
38  
39  
40  
41  
42  
43  
44  
45  
46  
47  
48  
49  
50  
51  
52  
53  
54  
55  
56  
57  
58  
59  
60

**Table 1. Key medication management issues affecting home nursing clients, identified by stakeholders and review of client data**

- 
- High prevalence of polypharmacy (5 or more medicines)
  - Complex medication regimens sometimes necessitating multiple daily nurse home visits
  - High prevalence of medication errors and other medication-related problems
  - Difficulty obtaining, and maintaining, up-to-date medication treatment authorisations<sup>^</sup> from prescribers
  - Discrepancies between medication treatment authorisations and client's medicines (including pharmacy-packed dose administration aids)
  - Lack of communication and sharing of medication information between prescribers, community pharmacies and community nurses
  - Lack of clinical pharmacy support and access to medicines information and advice for community nurses
  - Poor client access to community pharmacists due to poor mobility
  - Very low rate of HMR, despite nurses' efforts to organise them through clients' GPs (due to barriers such as low GP acceptances of nurses' recommendations, and HMR requirements that: a) require GPs to see the patient to explain the process and obtain consent before initiating a pharmacist referral, b) do not allow community nurses to directly refer clients to an HMR pharmacist, and c) restrict the frequency of HMR)
  - Lack of involvement of community nurses when a HMR occurs (nurses not informed when review occurs, not consulted about the client's medication management and not provided with copy of HMR report)

---

GP =General Practitioner; HMR = Home Medicines Review (Australian Government-funded, GP-initiated pharmacist medication review programme)

<sup>^</sup> Medication treatment authorisations are medication administration charts or other medication lists or orders signed by a medical practitioner authorising the nurse to administer medicines or support clients' medicine self-administration.

**Table 2. Clinical pharmacist roles**

| <b>Direct client care</b>                                                                                                                                                                                                                                                                                                                                                                                                                                                                                                                                                                                                                                                                                                                                                                                                                                                                                                                                                                                                                                                                                                       | <b>Indirect client care</b>                                                                                                                                                                                                                                                                                                                                                    |
|---------------------------------------------------------------------------------------------------------------------------------------------------------------------------------------------------------------------------------------------------------------------------------------------------------------------------------------------------------------------------------------------------------------------------------------------------------------------------------------------------------------------------------------------------------------------------------------------------------------------------------------------------------------------------------------------------------------------------------------------------------------------------------------------------------------------------------------------------------------------------------------------------------------------------------------------------------------------------------------------------------------------------------------------------------------------------------------------------------------------------------|--------------------------------------------------------------------------------------------------------------------------------------------------------------------------------------------------------------------------------------------------------------------------------------------------------------------------------------------------------------------------------|
| <ul style="list-style-type: none"> <li>• Visiting clients in their homes (with the community nurse where practical) to review and discuss medicines management, identify medication-related problems and educate clients/carers on their medicines use;</li> <li>• Obtaining ‘best-possible medication histories’ (current medication list, verified using two or more sources);</li> <li>• Reconciling the best-possible medication history with current medication orders held by the home nursing service to identify and resolve discrepancies;</li> <li>• Working with clients’ prescribers and community pharmacies to resolve medication-related problems, withdraw (deprescribe) unnecessary or inappropriate medicines and simplify medication regimens;</li> <li>• Liaising with prescribers and community pharmacies to update clients’ medicines lists and community nurses’ medication treatment authorisations^;</li> <li>• Providing advice to community nurses to optimise clients’ medication management plans;</li> <li>• Answering client-specific medicines information questions from community</li> </ul> | <ul style="list-style-type: none"> <li>• Answering general medicines information questions from nurses</li> <li>• Providing nurse education regarding medicines and medication management</li> <li>• Developing medication information resources for nurses</li> <li>• Contributing to development or revision of organisational medication policies and procedures</li> </ul> |

---

nurses and others;

- Following-up clients and/or community nurses, GPs, community pharmacies to ensure positive outcomes from medicine reviews (via telephone and/or repeat home visits where necessary).

---

<sup>^</sup> Medication treatment authorisations are medication administration charts or other medication lists or orders signed by a medical practitioner authorising the nurse to administer medicines or support clients' medicine self-administration.

**Table 3. Medication-related risk factors and problems that could trigger a pharmacist referral**

- 
- $\geq 8$  medicines
  - $\geq 1$  high or moderate risk medicines<sup>#</sup>
  - $> 1$  prescriber or pharmacy
  - $> 1$  medication treatment authorisations<sup>^</sup>
  - Discharged from hospital in the past month
  - Experiencing possible medicine side effects
  - Recent medication error or incident
  - Client or carer concerns about their medicines
  - Nurse concerns about medication regimen (e.g. potentially inappropriate medicines, unclear/ambiguous medication orders, complex dosing regimen)
- 

<sup>#</sup> High risk medicines: anticoagulants, chemotherapeutic agents excluding hormonal agents, immunosuppressant agents, insulins, levodopa, lithium, opiates; Moderate risk medicines: anticonvulsants, anti-infectives excluding topical agents, antipsychotics, benzodiazepines, digoxin, loop diuretics, oral hypoglycaemics, oral corticosteroids.

<sup>^</sup> Medication treatment authorisations are medication administration charts or other medication lists or orders signed by a medical practitioner authorising the nurse to administer medicines or support clients' medicine self-administration. Clients sometimes have multiple authorisations (e.g. a general practitioner [GP]-provided medicine list plus one or more letters from the GP, specialist or other prescriber indicating a medicine change).

**Table 4: Key differences between the home nursing clinical pharmacy model and the Australian Home Medicines Review (HMR) model\***

| <b>Components</b>                                               | <b>Home nursing clinical pharmacy model</b>                                                                                                            | <b>Home Medicines Review model*</b>                                                                   |
|-----------------------------------------------------------------|--------------------------------------------------------------------------------------------------------------------------------------------------------|-------------------------------------------------------------------------------------------------------|
| Referral process for medication review                          | Direct referral by community nurses                                                                                                                    | Requires nurse to request client's GP make a referral                                                 |
| Likelihood of review occurring following nurse referral/request | High                                                                                                                                                   | Low <sup>#</sup>                                                                                      |
| Timeliness of medication review                                 | Rapid                                                                                                                                                  | Slow <sup>#</sup>                                                                                     |
| Home visit process                                              | Home visit by the clinical pharmacist alongside community nurse                                                                                        | Home visit by the clinical pharmacist alone                                                           |
| Medication review                                               | Addresses the medication management and information needs of the community nurse <sup>^</sup> as well as the client/carer, GP and community pharmacist | Does not address the medication management and information needs of the community nurse <sup>^</sup>  |
| Medication review report                                        | Copy provided to GP, community pharmacy and community nurse                                                                                            | Copy not provided to community nurse                                                                  |
| GP remuneration                                                 | GP only remunerated for standard patient consultations                                                                                                 | GP receives additional remuneration for initiating the HMR and preparing a medication management plan |
| Post-medication review process                                  | Follow up and ongoing support for clients, carers, community nurses and other health providers to ensure medication issues are resolved                | No follow-up or ongoing medication management support available from the clinical pharmacist.         |
| Indirect care                                                   | Community nurses able to contact clinical pharmacist for advice or assistance with medication management issues or questions as they arise             | Not available                                                                                         |

GP = General Practitioner

\* Home Medicines Review (HMR): Australian Government funded pharmacist medication review program



# Low uptake of HMR due to poor acceptance of community nurse requests for an HMR and programme restrictions on frequency of HMR; Delays due to need for GP to see the patient to obtain consent, then make referral to an HMR pharmacist

^ Information needs of the community nurse include: Assistance with clarifying or simplifying ambiguous or complex medication treatment authorisations and addressing discrepancies with clients' medicines; Targeted regimen simplification (where appropriate) to minimise home nursing visits; Assistance with sourcing updated medication treatment authorisations (signed by GP); Advice about medicines storage and administration; Advice about monitoring medication outcomes and adverse effects.

## REFERENCES

1. Elliott RA, Lee CY, Beanland C, et al. Medicines management, medication errors and adverse medication events in older people referred to a community nursing service: a retrospective observational study. *Drugs - Real World Outcomes* 2016;**3**(1):13-24.
2. Griffiths R, Johnson M, Piper M, et al. A nursing intervention for the quality use of medicines by elderly community clients. *International journal of nursing practice* 2004;**10**(4):166-76.
3. Johnson M, Griffiths R, Piper M, et al. Risk factors for an untoward medication event among elders in community-based nursing caseloads in Australia. *Public health nursing (Boston, Mass.)* 2005;**22**(1):36-44.
4. Meredith S, Feldman PH, Frey D, et al. Possible medication errors in home healthcare patients. *Journal of the American Geriatrics Society* 2001;**49**(6):719-24.
5. Ellenbecker CH, Samia L, Cushman MJ, et al. Chapter 13: Patient Safety and Quality in Home Health Care. In: Hughes RG, ed. *Patient Safety and Quality: An Evidence-Based Handbook for Nurses*. Rockville MD, 2008.
6. Lee CY, Beanland C, Goeman D, et al. Evaluation of a support worker role, within a nurse delegation and supervision model, for provision of medicines support for older people living at home: the Workforce Innovation for Safe and Effective (WISE) Medicines Care study. *BMC health services research* 2015;**15**:460.
7. Clark JA, Gates BJ, McKeirnan KC, et al. Assessed Value of Consultant Pharmacist Services in a Home Health Care Agency. *The Consultant pharmacist : the journal of the American Society of Consultant Pharmacists* 2016;**31**(3):161-7.
8. Duckett S, Breadon P, Ginnivan L. Access all areas: new solutions for GP shortages in rural Australia, Grattan Institute, Melbourne, 2013. <https://grattan.edu.au/wp-content/uploads/2014/04/196-Access-All-Areas.pdf>.
9. Australian Medical Association (AMA). General Practice Pharmacists - Improving patient care. A proposal from the AMA for the Commonwealth Government to establish a funding program to integrate non-dispensing pharmacists within general practices, AMA, ACT, 2015. [https://ama.com.au/system/tdf/documents/Pharmacists\\_in\\_General\\_Practice\\_Proposal.pdf?file=1&type=node&id=42083](https://ama.com.au/system/tdf/documents/Pharmacists_in_General_Practice_Proposal.pdf?file=1&type=node&id=42083).
10. Deloitte Access Economics (DAE). Analysis of non-dispensing pharmacists in general practice clinics. Prepared by DAE for Australian Medical Association, DAE, ACT, 2015. <http://www.deloitteaccesseconomics.com.au/uploads/File/deloitte-au-economics-analysis-non-dispensing-pharmacists-general-practice-clinics-010415.pdf>.
11. Mekonnen AB, McLachlan AJ, Brien JA. Effectiveness of pharmacist-led medication reconciliation programmes on clinical outcomes at hospital transitions: a systematic review and meta-analysis. *BMJ open* 2016;**6**(2):e010003.

12. Pevnick JM, Shane R, Schnipper JL. The problem with medication reconciliation. *BMJ quality & safety* 2016 Sept;**25**(9):726-30.
13. Jokanovic N, Tan EC, van den Bosch D, et al. Clinical medication review in Australia: A systematic review. *Research in social & administrative pharmacy : RSAP* 2016;**12**(3):384-418.
14. Gillespie U, Alassaad A, Henrohn D, et al. A comprehensive pharmacist intervention to reduce morbidity in patients 80 years or older: a randomized controlled trial. *Archives of internal medicine* 2009;**169**(9):894-900.
15. The Pharmacy Guild of Australia. 6th Community Pharmacy Agreement: Home Medicines Review (HMR) - Programme specific guidelines. The Pharmacy Guild of Australia and the Australian Government Department of Health, ACT, Australia, 2015. <http://6cpa.com.au/medication-management-programs/home-medicines-review/>.
16. Lee CY, George J, Elliott RA, et al. Exploring stakeholder perspectives on medication review services for older residents in retirement villages. *Int J Pharm Pract* 2012 Aug;**20**(4):249-58.
17. Kyle G, Nissen L. A community nurse referral system for Home Medicines Reviews - can it work? *Aust Pharm* 2006;**25**(4):326-31.
18. Elliott RA, Martinac G, Campbell S, et al. Pharmacist-led medication review to identify medication-related problems in older people referred to an Aged Care Assessment Team: a randomized comparative study. *Drugs & aging* 2012;**29**(7):593-605.
19. Lee CY, George J, Elliott R, et al. Exploring medication risk among older residents in supported residential services: a cross-sectional study. *J Pharm Pract Res* 2011;**41**(2):98-101.
20. Elliott RA, Lee CY. Poor uptake of interdisciplinary medicine reviews for older people is a barrier to deprescribing. *BMJ (Clinical research ed.)* 2016;**353**:i3496.
21. Goeman D, King J, Koch S. Development of a model of dementia support and pathway for culturally and linguistically diverse communities using co-creation and participatory action research. *BMJ open* 2016;**6**(12):e013064.
22. Meyer J. Action Research. In: Pope C, Mays N, eds. *Qualitative research in health care*. 3rd ed. MA: Blackwell Publishing, 2006:121-31.
23. The Society of Hospital Pharmacists of Australia (SHPA) Committee of Specialty Practice in Clinical Pharmacy. SHPA Standards of Practice for Clinical Pharmacy. *Journal of Pharmacy Practice and Research* 2005;**35**(2):122-48.
24. Australian Pharmaceutical Advisory Council (APAC). Guiding principles for medication management in the community. Commonwealth of Australia, ACT, Australia, 2006. <http://www.health.gov.au/internet/main/publishing.nsf/Content/apac-publications-guiding>.
25. Epping-Jordan JE, Pruitt SD, Bengoa R, et al. Improving the quality of health care for chronic conditions. *Quality & safety in health care* 2004;**13**(4):299-305.
26. Jokanovic N, Tan EC, Sudhakaran S, et al. Pharmacist-led medication review in community settings: An overview of systematic reviews. *Research in social & administrative pharmacy : RSAP* 2017;**13**(4):661-85.
27. Vink J, Morton D, Ferreri S. Pharmacist identification of medication-related problems in the home care setting. *The Consultant pharmacist : the journal of the American Society of Consultant Pharmacists* 2011;**26**(7):477-84.
28. Reidt SL, Larson TA, Hadsall RS, et al. Integrating a pharmacist into a home healthcare agency care model: impact on hospitalizations and emergency visits. *Home healthcare nurse* 2014;**32**(3):146-52.

- 1
- 2
- 3 29. Dilks S, Emblin K, Nash I, et al. Pharmacy at home: service for frail older patients
- 4 demonstrates medicines risk reduction and admission avoidance. *Clinical Pharmacist*
- 5 2016;**8**(7).
- 6
- 7 30. Elliott RA, Booth JC. Problems with medicine use in older Australians: a review of recent
- 8 literature. *Journal of Pharmacy Practice and Research* 2014;**44**:258-71.
- 9
- 10 31. Mortimer D. Return on investment for RDNS-Visiting Pharmacist (ViP) service versus
- 11 Home Medicine Reivew (HMR) service from a health system perspective. Final
- 12 report prepared by Monash University Centre for Health Economics (CHE) for Royal
- 13 District Nursing Service (RDNS). Monash University CHE and RDNS, Melbourne,
- 14 Australia. September 2016. (unpublished)
- 15
- 16
- 17
- 18
- 19
- 20
- 21
- 22
- 23
- 24
- 25
- 26
- 27
- 28
- 29
- 30
- 31
- 32
- 33
- 34
- 35
- 36
- 37
- 38
- 39
- 40
- 41
- 42
- 43
- 44
- 45
- 46
- 47
- 48
- 49
- 50
- 51
- 52
- 53
- 54
- 55
- 56
- 57
- 58
- 59
- 60

For peer review only

# BMJ Open

## Development of a clinical pharmacy model within an Australian home nursing service using co-creation and participatory action research: the Visiting Pharmacist (ViP) study

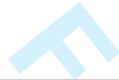

|                                 |                                                                                                                                                                                                                                                                                                                                                                                                                                                                                                                                                                                                                                                                                                                                                                                                                                                        |
|---------------------------------|--------------------------------------------------------------------------------------------------------------------------------------------------------------------------------------------------------------------------------------------------------------------------------------------------------------------------------------------------------------------------------------------------------------------------------------------------------------------------------------------------------------------------------------------------------------------------------------------------------------------------------------------------------------------------------------------------------------------------------------------------------------------------------------------------------------------------------------------------------|
| Journal:                        | <i>BMJ Open</i>                                                                                                                                                                                                                                                                                                                                                                                                                                                                                                                                                                                                                                                                                                                                                                                                                                        |
| Manuscript ID                   | bmjopen-2017-018722.R1                                                                                                                                                                                                                                                                                                                                                                                                                                                                                                                                                                                                                                                                                                                                                                                                                                 |
| Article Type:                   | Research                                                                                                                                                                                                                                                                                                                                                                                                                                                                                                                                                                                                                                                                                                                                                                                                                                               |
| Date Submitted by the Author:   | 17-Sep-2017                                                                                                                                                                                                                                                                                                                                                                                                                                                                                                                                                                                                                                                                                                                                                                                                                                            |
| Complete List of Authors:       | Elliott, Rohan; Austin Health, Pharmacy Department; Monash University Faculty of Pharmacy and Pharmaceutical Sciences, Centre for Medicine Use and Safety<br>Lee, Cik Yin; Bolton Clarke (formerly Royal District Nursing Service), RDNS Institute; Monash University Faculty of Pharmacy and Pharmaceutical Sciences, Centre for Medicine Use and Safety<br>Beanland, Christine; Bolton Clarke (formerly Royal District Nursing Service), RDNS Institute<br>Goeman, Dianne; Bolton Clarke (formerly Royal District Nursing Service), RDNS Institute; Monash University, Central Clinical School<br>Petrie, Neil; PRN Consulting<br>Petrie, Barbara ; PRN Consulting<br>Vise, Felicity; Bolton Clarke (formerly Royal District Nursing Service), RDNS Institute<br>Gray, June; Bolton Clarke (formerly Royal District Nursing Service), RDNS Institute |
| <b>Primary Subject Heading</b>: | Patient-centred medicine                                                                                                                                                                                                                                                                                                                                                                                                                                                                                                                                                                                                                                                                                                                                                                                                                               |
| Secondary Subject Heading:      | Health services research, Pharmacology and therapeutics, Nursing, General practice / Family practice, Geriatric medicine                                                                                                                                                                                                                                                                                                                                                                                                                                                                                                                                                                                                                                                                                                                               |
| Keywords:                       | co-creation and participatory action research, medication management, older people, home nursing or home care, medication review, clinical pharmacy                                                                                                                                                                                                                                                                                                                                                                                                                                                                                                                                                                                                                                                                                                    |
|                                 |                                                                                                                                                                                                                                                                                                                                                                                                                                                                                                                                                                                                                                                                                                                                                                                                                                                        |

SCHOLARONE™  
Manuscripts

**TITLE**

Development of a clinical pharmacy model within an Australian home nursing service using co-creation and participatory action research: the Visiting Pharmacist (ViP) study

**AUTHORS**

Rohan A Elliott,<sup>1,2,3</sup> Cik Yin Lee,<sup>1,3,4</sup> Christine Beanland,<sup>1</sup> Dianne Goeman,<sup>1,5</sup> Neil Petrie,<sup>6</sup> Barbara Petrie,<sup>6</sup> Felicity Vise,<sup>1</sup> June Gray<sup>1</sup>

**AFFILIATIONS AND ADDRESSES**

<sup>1</sup> Bolton Clarke (formerly Royal District Nursing Service), St Kilda, VIC, Australia

<sup>2</sup> Pharmacy Department, Austin Health, Heidelberg, VIC, Australia

<sup>3</sup> Centre for Medicine Use and Safety, Monash University, Parkville, VIC, Australia

<sup>4</sup> Department of Nursing, The University of Melbourne, Melbourne, VIC, Australia

<sup>5</sup> Central Clinical School, Monash University, Melbourne, VIC, Australia

<sup>6</sup> PRN Consulting, Melbourne, VIC, Australia

**CORRESPONDING AUTHOR**

Rohan A Elliott

Pharmacy Department, Austin Health

300 Waterdale Rd, Heidelberg West, VICTORIA 3081, Australia

Email: [rohan.elliott@austin.org.au](mailto:rohan.elliott@austin.org.au)

Telephone: +61(3) 9496 2334

## ABSTRACT

### Objective

To develop a collaborative, person-centred model of clinical pharmacy support for community nurses and their medication management clients.

### Design

Co-creation and participatory action research, based on reflection, data collection, interaction and feedback from participants and other stakeholders.

### Setting

A large, non-profit home nursing service in Melbourne, Australia.

### Participants

Older people referred to the home nursing service for medication management, their carers, community nurses, general practitioners (GPs) and pharmacists, a multidisciplinary stakeholder reference group (including consumer representation) and the project team.

### Data collection and analysis

Feedback and reflections from minutes, notes and transcripts from: project team meetings, clinical pharmacists' reflective diaries and interviews, meetings with community nurses, reference group meetings and interviews and focus groups with 27 older people, 18 carers, 53 nurses, 15 GPs, 7 community pharmacists.

### Results

The model was based on best-practice medication management standards and designed to address key medication management issues raised by stakeholders. Pharmacist roles included direct client care and indirect care. Direct care included home visits, medication reconciliation, medication review, medication regimen simplification, preparation of medication lists for clients and nurses, liaison and information-sharing with prescribers and pharmacies and patient/carer education. Indirect care included providing medicines

1  
2  
3 information and education for nurses and assisting with review and implementation of  
4  
5 organisational medication policies and procedures. The model allowed nurses to refer directly  
6  
7 to the pharmacist, enabling timely resolution of medication issues. Direct care was provided  
8  
9 to 84 older people over a 15-month implementation period. Ongoing feedback and  
10  
11 consultation, in line with participatory action research principles, informed the development  
12  
13 and refinement of the model and identification of enablers and challenges.  
14

## 15 16 **Conclusions**

17  
18 A collaborative, person-centred clinical pharmacy model that addressed the needs of clients,  
19  
20 carers, nurses and other stakeholders was successfully developed. The model is likely to have  
21  
22 applicability to home nursing services nationally and internationally.  
23  
24  
25  
26

## 27 **ARTICLE SUMMARY**

### 28 29 **Strengths and limitations of this study**

- 30  
31
- 32 • A co-design and participatory research approach, incorporating extensive and  
33 repeated consultation and feedback from home nursing clients, carers, nurses, general  
34 practitioners, pharmacists and other experts, was used to develop a model of clinical  
35 pharmacy support that addressed the needs of the home nursing service and its clients.  
36  
37
  - 38 • Best practice standards and guidelines for medication management and clinical  
39 pharmacy services were used to underpin development of the model.  
40  
41
  - 42 • The model was developed within a single, metropolitan, home nursing service, so  
43 further work is needed to determine its generalisability to other services and in  
44 particular to rural services.  
45  
46
  - 47 • While feedback indicated that the model met stakeholders' needs, further studies  
48 should assess the impact on client outcomes and cost-effectiveness of the model.  
49  
50  
51  
52  
53  
54  
55  
56  
57  
58  
59  
60

1  
2  
3 **Acknowledgements** The authors thank all of the participants who contributed to the  
4 development and implementation of the model, including home nursing clients and their  
5 carers, community nurses and their managers, GPs, community pharmacists and reference  
6 group members. We also thank the charitable trusts (listed below) who helped fund the study,  
7 and the following people who assisted with the study: Susan Koch, Nevola Templestone, Julie  
8 Curtis, Justine Norling and Julie Murphy.  
9  
10  
11  
12

13  
14 **Author contributions** RAE and CB conceived, initiated and led the study. CYL project  
15 managed the study and collected data with assistance from all authors. RAE and CB led the  
16 development of the model, with input from all authors. All authors contributed to  
17 implementation of the model. CYL, RAE, CB and DG analysed the data with input from all  
18 authors. RAE and CYL prepared the manuscript. All authors reviewed and approved the  
19 manuscript.  
20  
21  
22  
23  
24

25  
26 **Funding** This work was supported by grants from the Ian Rollo Currie Estate, Lynne Quayle  
27 Charitable Trust and RDNS Trust. The funders had no role in the design or conduct of the  
28 study, data collection, management, analysis and interpretation, or preparation, review or  
29 approval of the manuscript.  
30  
31  
32  
33

34 **Competing interests** The authors have no conflicts of interest that are relevant to the content  
35 of this article.  
36  
37  
38

39 **Ethics approval** This study was approved by the Royal District Nursing Service Research  
40 Ethics Committee and the Monash University Human Research Ethics Committee.  
41  
42  
43

44 **Data sharing statement** Individual participant data for this study will not be available for  
45 sharing due to requirements imposed by ethics. Other study materials such as protocols  
46 relating to the study implementation and evaluation will be shared upon request from the  
47 authors.  
48  
49  
50  
51  
52  
53  
54  
55  
56  
57  
58  
59  
60



## BACKGROUND

Home nursing services provide nursing and personal care to people in their own homes. A common reason for referral to home nursing services in Australia is to assist with medication management when a person is unable to manage their medicines independently, due to declining health or cognitive function. The level of support provided depends on the client's capacity to self-administer their medicines and the availability of other supports such as family carers. It ranges from monitoring medicine-taking, to prompting or assisting with self-administration of medicines, through to administering medicines from a locked box stored in the patient's home.

People who receive medication management support from home nursing services are a group who are at significant risk of adverse medication events (AMEs).<sup>1,4</sup> They are typically older, frail, with multiple health problems and multiple medicines.<sup>1,3,4</sup> Often they have been recently hospitalised. They are frequently prescribed potentially inappropriate or high-risk medicines and they experience a high rate of medication errors.<sup>1,4</sup>

The risk of medication errors in the home care setting may be greater than in institutional settings such as hospitals and nursing homes because of the unstructured environment and barriers to interdisciplinary communication and teamwork.<sup>5,6</sup> For example, community nurses usually have no formal relationship and limited contact with clients' medical practitioners and pharmacies. There may be multiple prescribers and pharmacies involved in the client's care. Prescribers and pharmacists may not see the client regularly, and it can be challenging for nurses to obtain and maintain accurate medication treatment authorisations (signed orders from a medical practitioner authorising the nurse to administer medicines or assist with administration).<sup>1</sup> Clients (or their family carers) may continue to administer some medicines or doses independently (e.g. between nurse visits).

In the USA it is mandated that clients referred to home healthcare services (which are similar to home nursing services in Australia) receive a medication review.<sup>7</sup> This is usually conducted by a nurse. In Australia, there is no such requirement and home nursing clients do not routinely receive a comprehensive medication review or medication reconciliation to

1  
2  
3 identify treatment authorisation errors or potentially inappropriate medicines, or to simplify  
4 complex medication regimens.  
5  
6

7  
8 Despite medicines management being a major component of home care business, and despite  
9 the high rate of medication errors and AMEs, home nursing providers usually do not employ  
10 pharmacists.<sup>1 8 9</sup> There is evidence that clinical pharmacy services can reduce medication-  
11 related problems, polypharmacy and AMEs, and may be cost-effective.<sup>10-16</sup> Clinical  
12 pharmacy services encompass a range of patient-focused services provided by pharmacists  
13 that aim to minimise the inherent risks associated with the use of medicines, ensure  
14 medicines are used appropriately and optimise health outcomes.<sup>17</sup>  
15  
16  
17  
18  
19

20  
21 One component of a clinical pharmacy service is medication review. In Australia, home  
22 nursing clients can receive a government-funded Home Medicines Review (HMR) if their  
23 general practitioner (GP) thinks they would benefit and makes a referral to an accredited  
24 pharmacist.<sup>18</sup> However there are a number of structural, professional and patient barriers that  
25 have resulted in poor uptake of HMRs.<sup>14 19</sup> Nurses and pharmacists cannot initiate a HMR,  
26 and despite efforts over many years to increase HMR rates, including strategies specifically  
27 targeting home nursing clients, uptake among high-risk individuals remains low.<sup>1 20-23</sup> Other  
28 limitations of the HMR program, in the context of home care, are that it is a one-off service  
29 and it does not provide broader clinical pharmacy support. Other clinical pharmacy services  
30 relevant to home nursing include review, reconciliation and updating of clients' medication  
31 treatment authorisations, medicines information and education for nurses, and development  
32 or review of organisational medication policies.  
33  
34  
35  
36  
37  
38  
39  
40  
41  
42

43 The aim of this study was to develop a collaborative, person-centered model of clinical  
44 pharmacy support for nurses and clients of a home nursing service in order to improve access  
45 to clinical pharmacy services, enhance interdisciplinary teamwork and help address problems  
46 with medication management and medication safety.  
47  
48  
49

## 50 51 **METHODS** 52

### 53 54 55 **Setting** 56 57 58 59 60

1  
2  
3 The clinical pharmacy model was developed at a large, non-profit home nursing service in  
4 Melbourne, Australia between 2013 and 2015. As part of the development process, it was  
5 implemented at two sites within the organisation between September 2014 and December  
6 2015. The sites employed 103 nurses and seven personal care workers who provided care to  
7 2,534 clients, of whom 1,089 (43%) received medication management support (monitoring,  
8 prompting or assisting self-administration, or nurse administration of medicines).  
9  
10  
11  
12

## 13 14 15 **Study design**

### 16 17 18 *Theoretical study framework*

19  
20  
21 The study used a co-creation and participatory action research approach to design, implement  
22 and refine the clinical pharmacy service model. This is an approach to research that includes  
23 active involvement of relevant stakeholders, including consumers, in order to understand  
24 their world and ensure that research outcomes are appropriate to identified needs.<sup>24 25</sup>  
25  
26  
27

28 Problems with existing community-based medication management and the need to design  
29 healthcare systems around consumers' and health professionals' needs influenced the  
30 decision to use a co-creation and participatory action research approach. The approach  
31 involved interaction and consultation with, and reflections from, participants and stakeholders  
32 before and during development of the model, along with prospective collection of data during  
33 implementation of the model. The co-creation and participatory action research approach  
34 engaged stakeholders in both the design and implementation. It allowed the model to be  
35 responsive to the clinical environment, to ensure it would be useful, sustainable and  
36 transferrable.  
37  
38  
39  
40  
41  
42  
43  
44

### 45 *Framework for development of the model*

46  
47  
48 In addition to focusing on stakeholders' needs, development of the model took learnings from  
49 well-established, successful clinical pharmacy models in hospital and residential aged care  
50 settings. Components of the model were based on Australian standards of practice for clinical  
51 pharmacy, which define evidence-based clinical pharmacy activities that constitute best  
52 practice medication management. These include: medication reconciliation, medication  
53 review, input into medication care plans and provision of medicines information.<sup>17</sup> Australian  
54 guidelines for medication management in community settings and the Chronic Care Model  
55  
56  
57  
58  
59  
60

1  
2  
3 were also used to guide aspects of the model.<sup>26 27</sup> Relevant sections of the medication  
4 management guidelines included administration of medicines, dose administration aids,  
5 medication lists, medication review and risk management.<sup>26</sup> The Chronic Care Model is a  
6 well-established, evidence-based framework for chronic care management and practice  
7 improvement that advocates a collaborative, person-centred approach to improve chronic  
8 disease management.<sup>27</sup> The specific roles and methods of delivery were modified for the  
9 home nursing setting, based on stakeholders' input and feedback.  
10  
11  
12  
13

## 14 15 16 **Participants**

17  
18  
19 Six health professionals and researchers with extensive experience in aged care and  
20 medication management led the development and implementation of the model (a community  
21 nurse/academic, a clinical pharmacist/academic, a community pharmacist/academic, two  
22 nurse managers and a sociologist). A purposively selected multidisciplinary stakeholder  
23 reference group was established to provide input into planning and implementation of the  
24 model, to ensure it met stakeholders' needs and was acceptable to all stakeholders. The  
25 reference group included: practising nurses, pharmacists and GPs, consumer and ethnic  
26 community advocates, community aged care and community nursing managers, government  
27 health department representatives and representatives from nursing and pharmacy  
28 professional societies. Two experienced consultant clinical pharmacists were employed (12  
29 hours/week each) during the implementation phase. Other key participants were: older people  
30 (clients) referred to the home nursing service for any level of medication management  
31 support, their carers (where relevant) and their community nurses, GPs and community  
32 pharmacies.  
33  
34  
35  
36  
37  
38  
39  
40  
41  
42  
43

44 To facilitate co-design and refinement of the model, in-depth interviews and focus groups  
45 were conducted with convenience samples of clients, carers, nurses, GPs, community  
46 pharmacists and consultant pharmacists before and during implementation of the model.  
47 Clients with cognitive impairment or poor literacy in English were included. Professional  
48 interpreters were used for non-English speaking older people /carers.  
49  
50  
51  
52  
53

## 54 55 **Data collection and analysis**

Multiple data sources were used to inform and capture the co-design, implementation and refinement of the model:

- minutes from project team meetings (n=30);
- minutes from stakeholder reference group meetings (n=5);
- audit of medication management client records prior to model development (n=100);<sup>1</sup>
- in-depth interviews and focus groups with older people (n=27), carers (n=18), community nurses (n=53), GPs (n=15), community pharmacists (n=7) and consultant pharmacists (n=2) before and during implementation;
- notes from consultant clinical pharmacists' reflective diaries (n=2) and debrief meetings with the project team (n=4);
- case notes summarising individual clients' participation in the model and reasons for nurses' referral (n=84);
- notes from community nurses' clinical meetings (n=15); and
- records of direct communication (e.g. email) to the research team from nurses and pharmacists (which was encouraged as a means of providing rapid feedback and resolution of issues during implementation).

At some meetings, case notes for selected clients (de-identified) were presented to generate discussion about the model, including success factors, enablers and challenges.

Data from these sources were used to identify issues and gaps in medication management processes, review functions, incorporate evidence-based strategies/approaches in the model, and continuously evaluate the model with respect to stakeholder acceptance and feedback, and ability of the model to address key issues and gaps in care. Thematic analysis of interview and focus group data and analysis of outcomes from pharmacist medication reviews is beyond the scope of this paper. Pharmacists prospectively recorded time spent delivering clinical pharmacy services using a log sheet.

## RESULTS

Stakeholder consultation and audit of medication management client records prior to developing the clinical pharmacy model highlighted key issues that the model needed to address (**Table 1**). These issues helped inform development of the Visiting Pharmacist (ViP)

1  
2  
3 clinical pharmacy model for home nursing clients. Ongoing feedback and consultation  
4 throughout the project enabled the model, and pharmacist roles, to be refined over time.  
5  
6

### 7 8 **The clinical pharmacy model** 9

10  
11 Pharmacist roles identified throughout the project were broadly classified into direct client  
12 care and indirect client care. Direct care was any activity addressing the needs of a specific  
13 client. Most commonly this involved one or more home visits, medication reconciliation and  
14 comprehensive medication review, however there were occasions when client-specific issues  
15 were able to be addressed without a home visit. Indirect care included activities that were not  
16 related to a specific patient and would be expected to improve medication management  
17 across a number of clients or the whole organisation. Clinical pharmacist roles are  
18 summarised in Table 2, and the model is contrasted with the Australian HMR program in  
19 Table 3.  
20  
21  
22  
23  
24  
25  
26  
27

### 28 *Communication between the pharmacists and community nurses* 29

30  
31 Community nurses spend most of their time on the road visiting clients, and are dispersed  
32 over a wide geographical area. This makes communication and teamwork more challenging  
33 than it is in hospital and residential care settings. In our model nurses telephoned the  
34 pharmacist if they had urgent questions about medication management. Non-urgent  
35 communication was through electronic messaging (secure organisational email network or  
36 documentation in clients' clinical records). Face-to-face contact was achieved through joint  
37 pharmacist-nurse client home visits and pharmacist attendance at nurses' clinical meetings.  
38  
39  
40  
41  
42  
43  
44

### 45 *Referrals for direct client care* 46

47  
48 The model enabled nurses to refer clients directly to the clinical pharmacist if the client had  
49 one or more medication-related risk-factors or problems or if the nurse had any other  
50 concerns about the client's medication management (**Table 4**). Education, a written protocol  
51 and a referral form were provided to nurses to help them identify and refer suitable clients.  
52  
53  
54  
55

### 56 *Direct client care without home visit* 57 58 59 60

1  
2  
3 Direct care without a home visit included answering client-specific medicines information  
4 questions from nurses (e.g. can a dose-time be changed from evening to morning to reduce  
5 the number of nurse visits), liaising with prescribers to address issues with medication orders  
6 (e.g. to clarify a confusing or conflicting order, or simplify a complex regimen) and liaising  
7 with community pharmacists to resolve discrepancies in dose administration aids.  
8  
9

### 10 11 12 13 *Direct client care with home visit*

14  
15  
16 The process for pharmacist home visits was as follows. The community nurse obtained verbal  
17 consent from the client or their family carer for the pharmacist visit and a referral form was  
18 sent to the clinical pharmacist via secure email. The form included client details, reason(s) for  
19 referral (free-text) and medication-related risk-factors or problems (tick-box) (**Table 4**). A  
20 letter was sent to the client's GP and community pharmacy notifying them that the referral  
21 had been made and informing them that they would receive verbal and/or written  
22 communication from the clinical pharmacist.  
23  
24  
25  
26  
27  
28

29  
30 Prior to visiting the client's home, the pharmacist reviewed referral documents, collated  
31 information on the client's medicines use, and liaised with the community nurse and  
32 client/carer for a time to visit the client. Pharmacist home visits were usually conducted with  
33 the community nurse, to enable the nurse to introduce the pharmacist and participate in the  
34 discussion, however nurses usually did not stay for the entire pharmacist consultation. The  
35 pharmacist obtained a best-possible medication history (medication history confirmed using  
36 two or more sources), performed medication reconciliation, reviewed the way medicines  
37 were stored and used, reviewed the indication for each medicine to determine ongoing need  
38 and appropriateness, checked clients' administration technique if they were self-  
39 administering any medicines, provided education and answered questions.  
40  
41  
42  
43  
44  
45  
46  
47

48 Following the home visit, the pharmacist prepared a report that included an accurate  
49 medicines list, medication review findings and recommendations to address medication-  
50 related issues. The report was sent to the client's GP, community pharmacy, and community  
51 nurse. Where relevant it was also sent to other prescribers (e.g. specialist physicians). A  
52 patient copy of the medicines list was provided to the client and/or carer if appropriate. If the  
53 nurses' medication treatment authorisation was not accurate, or there were medication  
54 changes as a result of the medication review, the pharmacist asked the GP to provide a new  
55  
56  
57  
58  
59  
60

1  
2  
3 treatment authorisation or to sign the pharmacist-prepared list to enable it to be used as a  
4 treatment authorisation.  
5  
6

7  
8 The pharmacist followed-up the report with telephone conversations with the client's GP,  
9 specialists and community pharmacist when necessary, to discuss issues and  
10 recommendations and ensure an updated, accurate treatment authorisation was provided to  
11 the community nurse. Where necessary the pharmacist provided follow-up to the client and  
12 carer, either by phone or with a second home visit.  
13  
14  
15

16  
17  
18 Outcomes and medication changes were communicated to all parties involved in the client's  
19 medication management to ensure everyone was working from the same medication list, and  
20 that any medication changes made by the GP were implemented by the community pharmacy  
21 and home nursing service.  
22  
23  
24

### 25 26 **Direct care home visit referrals** 27

28  
29 Over the 15-month implementation period, 43 community nurses referred 96 medication  
30 management clients to the clinical pharmacists. Eight-four (88%) referred clients received a  
31 pharmacist medication review and medication reconciliation. Of these, 82 required a  
32 pharmacist home visit. Seventy-three (89%) home visits were made in conjunction with a  
33 nurse, and 9 (11%) were made by the pharmacist alone. Eleven (13%) clients received a  
34 second pharmacist home visit. The clients' median age was 85.5 years (interquartile range  
35 [IQR] 77-89) and they used a median of 13 medicines (IQR 10-17). They had 74 GPs (from  
36 56 different clinics) and used 49 different community pharmacies. Twenty-nine (34.5%)  
37 clients had medicines prescribed by one or more medical specialist(s) in addition to their GP.  
38 The most common reasons for pharmacist referral specified by nurses on referral forms were  
39 to simplify complex medication regimens (35/84; 42%) and concerns about inaccurate,  
40 incomplete or multiple medication treatment authorisations (18/84; 22%).  
41  
42  
43  
44  
45  
46  
47  
48  
49

50  
51 Clinical pharmacists reported spending a median of 4.8 hours (IQR 3.6–6.6; range 2.0–11.3  
52 hours) per referred client. This included home visit(s), preparation of medication lists and  
53 medication review reports, and follow up with clients, carers, prescribers, pharmacies and  
54 nurses to ensure issues were addressed. It excludes travel time for client home visits (median  
55 39 minutes per client, IQR 20-70, range 10-150).  
56  
57  
58  
59  
60



### Indirect care

The pharmacists reported spending a median of 1.0 hour per week providing indirect care. This included answering medicines information questions, attending meetings with nurses, providing education to nurses and reviewing organisational medication management policies. They also spent a median of 1.0 hour per week on administrative tasks such as emails and non-clinical meetings.

### Stakeholder feedback during implementation

Feedback from clients, carers, community nurses, GPs and community pharmacists who participated in the study indicated the model was well accepted and addressed gaps in existing medication management processes. Nurses reported that the model improved access to clinical pharmacist consultations and medication review by enabling them to obtain client consent and directly initiate a review instead of having to ask the GP to organise a HMR (Table 3).

Nurses reported that the clinical pharmacy model was able to address medication-related issues that frequently impacted on their ability to provide safe, high quality care, such as inaccurate or confusing treatment authorisations, complex medication regimens requiring multiple daily visits, and uncertainty regarding appropriateness of medicines and risk of adverse effects. They felt the pharmacists saved them time and sometimes reduced the number of daily nurse visits required by clients, by clarifying confusing and conflicting medication lists, simplifying medication regimens or changing dose-times and organising updated medication treatment authorisations.

Nurses noted that under the existing Australian HMR model they are usually not aware when a medication review is conducted, nor consulted to obtain their insights into the clients' medication management and medication-related problems or to ascertain what issues or questions the nurses have with the client's medicines management. Nurses also do not receive a copy of the medication review report or an updated medicines list (Table 3). Nurses therefore felt more engaged with the medication review process in the ViP clinical pharmacy

1  
2  
3 model and felt they benefited more from it. They commented that the pharmacist was a  
4 valuable resource for them and their clients. They noted that they learnt a lot from doing joint  
5 visits with the pharmacist, and that the pharmacist had become a valuable member of the  
6 medication management team.  
7  
8  
9

10  
11 Most GPs who were interviewed were happy for a pharmacist medication review to be  
12 organised by the community nurse. They felt the model was a good way of ensuring that this  
13 high-risk client group received a review, noting that the more complex and time-consuming  
14 HMR process was sometimes a barrier for them making pharmacist referrals. However, a  
15 minority of GPs indicated they would have preferred to organise an HMR for the client.  
16  
17  
18  
19

20  
21 The clinical pharmacists reported that GPs were usually willing to engage with them to  
22 address medication-related problems and to review and sign the pharmacist-prepared  
23 medication list (to enable it to be used as a medication treatment authorisation) or provide an  
24 alternative updated and signed list. However, some GPs were less cooperative, and the  
25 pharmacists reported spending considerable time trying to follow-up medication issues with  
26 some GPs. This variable level of engagement, however, was not unique to the pharmacists, as  
27 community nurses reported that they also regularly experienced the same. Nurses who  
28 participated in the ViP clinical pharmacy model felt that the GPs were more willing to engage  
29 with the pharmacist than with them about medication issues, and saw this as another benefit  
30 of the model.  
31  
32  
33  
34  
35  
36  
37  
38

39  
40 Clients and carers reported that the pharmacist visit provided an opportunity for them to ask  
41 questions and increased their understanding of their medicines. Some reported that their  
42 medication regimen was simplified, saving them money and, sometimes, reducing the need  
43 for nurse visits by making it easier for them to take medicines independently. Some clients  
44 reported reduced side effects (e.g. drowsiness) and better function following changes to their  
45 medication regimen. Others were not able to identify specific benefits, but were happy to  
46 receive the pharmacist service if it helped their nurses or doctors.  
47  
48  
49  
50  
51

52  
53 All stakeholders reported that a valuable aspect of the pharmacist's role was facilitating  
54 information-sharing and improving teamwork among members of the medication  
55 management team. The follow-up and ongoing support provided by the pharmacist, including  
56 repeat home visits if required, were considered by all stakeholder to be a strength of the  
57  
58  
59  
60

1  
2  
3 model, as this enabled the pharmacist to assist with implementing changes to clients'  
4 medication regimens and medication management care plans, and helped ensure medication  
5 issues were resolved. This contrasts with the HMR model, in which lack of follow-up by the  
6 reviewing pharmacist was noted by stakeholders as a major limitation, resulting in  
7 medication-related issues not always being resolved (**Table 3**).  
8  
9  
10

### 11 12 13 **Pharmacist competencies**

14  
15  
16 Feedback from participants identified that the pharmacists required excellent interpersonal,  
17 listening, advocacy and communication skills, the ability to build trusting professional  
18 relationships and work effectively as part of a team, excellent assessment abilities, in-depth  
19 knowledge of pharmacology and medication management for older people, and strong  
20 leadership skills in order to provide person-centred care that met the needs of clients/carers,  
21 nurses, GPs and community pharmacies.  
22  
23  
24  
25  
26  
27

### 28 **Organisational support and resources**

29  
30  
31 Resources required to support the implementation of the clinical pharmacy model included  
32 access to office space, a mobile telephone, a fax machine, a computer with access to a range  
33 of medicines information resources, and a dedicated vehicle. The pharmacist also needed  
34 remote electronic access to clients' home nursing records, including correspondence from  
35 external providers such as GPs and hospitals, and ability to communicate securely by email  
36 with community nurses. Access to interpreters was also important.  
37  
38  
39  
40  
41  
42

### 43 **Enablers and challenges identified**

44  
45  
46 A number of factors helped make development and implementation of the model a success.  
47 Stakeholder consultation and the use of co-design and participatory action research principles  
48 ensured stakeholders had input into, and ownership of, the model. The high level of support  
49 for the role from nurses and nurse managers, and their willingness to accept the pharmacist as  
50 a member of their team and facilitate the pharmacists' role contributed to its success. The  
51 appointment of two experienced pharmacists to the role, who were able to work with the  
52 project team and the nurses and other health professionals to develop the role and manage  
53 challenges, was also a success factor.  
54  
55  
56  
57  
58  
59  
60

1  
2  
3  
4  
5 A challenge for the model was engaging GPs. As community nursing clients retain their usual  
6 GP, the consultant clinical pharmacists had to work with many different GPs. This is  
7  
8 illustrated by the fact that the 84 clients referred to the clinical pharmacy service had 74  
9  
10 different GPs. It was not possible to consult all GPs prior to implementing the model, so the  
11  
12 pharmacists had to engage with a new GP almost every time they reviewed a client. The  
13  
14 willingness of GPs to engage with the pharmacist varied.

15  
16 A factor that may have impacted on GPs' willingness to engage was the absence of  
17  
18 remuneration for time they spent reading medication review reports, taking phone calls from  
19  
20 the pharmacist to discuss medication issues and reviewing/preparing/signing medication  
21  
22 treatment authorisations. GPs only received payment if they had a formal consultation with  
23  
24 the patient. This, however, is similar to what happens for home nursing clients outside of the  
25  
26 ViP model, when GPs still need to provide community nurses with medication treatment  
27  
28 authorities (and update them when there are medication changes) and address concerns or  
29  
30 questions raised by nurses about their clients.

31  
32 The main challenge to the sustainability of the model is the absence of a specific funding  
33  
34 source for clinical pharmacy support within the home nursing sector. The Australian  
35  
36 government's HMR program rules preclude its use for this type of model, so funding needs to  
37  
38 come from other sources such as home and community care programs and the organisations  
39  
40 providing home care.

## 41 **DISCUSSION**

42  
43  
44  
45 This study describes the successful development of a collaborative, person-centred model of  
46  
47 clinical pharmacy support for nurses and clients of a home nursing service that incorporates  
48  
49 direct client care and indirect care (nurse support). The model targeted a group of  
50  
51 community-dwelling older people known to be at high risk of medication-related problems  
52  
53 and to have poor access to clinical pharmacy support.<sup>1 20</sup> It delivered a range of clinical  
54  
55 pharmacy services based on best practice standards and guidelines for clinical pharmacy and  
56  
57 medication management. Although a form of clinical pharmacy support was already available  
58  
59 in Australia, via the HMR program, previous research<sup>1 20</sup> and stakeholder consultation  
60

1  
2  
3 indicated that the HMR model was not able to address the needs of this patient group and the  
4 nurses supporting their medication management. The new model enabled timely access to  
5 clinical pharmacist advice and medication review to address medication issues, and facilitated  
6 communication and information sharing between the home nursing service, prescribers and  
7 community pharmacies. The success of the new model was demonstrated by high levels of  
8 uptake and acceptance of the pharmacists' role by all stakeholders, and its ability to meet  
9 stakeholders' needs.  
10  
11  
12  
13

14  
15  
16 A major strength of the study was the extensive stakeholder consultation, inclusion of  
17 consumers and other stakeholders in the co-creation of the model, and use of participatory  
18 action research to develop and refine the model. Limitations were that the model was  
19 developed and implemented within a single home nursing service, albeit one of the largest in  
20 Australia, and the study was not designed to measure the effect of the model on clinical and  
21 humanistic outcomes. Further work is therefore needed to determine generalisability of the  
22 model to other services, in particular to rural services, and impact on client outcomes. Time  
23 spent by pharmacists delivering the service were self-recorded and may be an under- or over-  
24 estimate.  
25  
26  
27  
28  
29  
30  
31

32  
33 Whilst there have been many previous studies describing pharmacist medication reviews in  
34 domiciliary or primary care settings,<sup>28</sup> there is very little literature describing the  
35 development or implementation of comprehensive clinical pharmacy services specifically for  
36 home nursing or home healthcare clients.<sup>29</sup> Our model differs from traditional domiciliary  
37 pharmacist models because it doesn't focus only on medication review. Instead it includes a  
38 range of clinical pharmacy roles including direct client care and indirect care to address the  
39 specific needs of community nurses and their clients. Functionally the model has similarities  
40 with hospital 'ward pharmacist' models and nursing home consultant pharmacist models, in  
41 that a designated pharmacist delivers a range of clinical pharmacy and medication safety  
42 functions to support the service and its patients or clients.  
43  
44  
45  
46  
47  
48  
49

50  
51 Given the ageing population, increasing polypharmacy and complexity of medication  
52 management, increasing prevalence of AMEs in the primary care setting,<sup>30</sup> and increasing  
53 demand for home care support to delay the need for residential aged care, our model is likely  
54 to have applicability to home nursing services nationally and internationally. Whilst  
55 community nurses play an important role in identifying and resolving medication-related  
56  
57  
58  
59  
60

1  
2  
3 problems for their clients, the complexity of modern pharmacotherapy means that they  
4 increasingly require support from clinical pharmacists, whose core expertise is reviewing  
5 medication management to ensure safe and appropriate use of medicines. Increasingly home  
6 nursing services are using staff with lesser training in pharmacology and therapeutics (e.g.  
7 enrolled nurses and personal care workers) for some medication management activities,  
8 further underscoring the need for pharmacist support. This need has been recognised in  
9 hospitals and nursing home settings, with widespread implementation of clinical pharmacist  
10 roles. But in the home care setting these roles are uncommon..  
11  
12  
13  
14  
15  
16

17  
18 The only related home care-based clinical pharmacy models we identified in the published  
19 literature were services delivered within some home healthcare services in the USA,<sup>9 31-33</sup> and  
20 a domiciliary pharmacy service provided by a community health and social care service in the  
21 UK.<sup>34</sup> In the USA, Redit et al described a home healthcare pharmacist role that included  
22 pharmacist home visits, medication reconciliation and medication review. The pharmacist  
23 also contributed to development of medication-related health service policies and nurse  
24 education.<sup>29</sup> Patients who received the pharmacist review were less likely to have a hospital  
25 admission or emergency room visit than those who did not.<sup>32</sup> In the UK, Dilks et al described  
26 a visiting pharmacist service for complex older people who were often housebound.<sup>34</sup> An  
27 evaluation of the service suggested that it could reduce unplanned hospital admissions and  
28 was likely to be cost-saving.<sup>34</sup> Some of the pharmacist roles in these studies were similar to  
29 our model, but little information was provided regarding the framework or processes used to  
30 develop these models and the extent to which the pharmacists liaised with community nurses  
31 and provided indirect care.  
32  
33  
34  
35  
36  
37  
38  
39  
40  
41  
42

43 Our model has potential to reduce the risk of AMEs, however further research is needed to  
44 confirm its impact on client outcomes. Preliminary evidence suggests the model could be  
45 cost-saving to the health system, with a Return on Investment analysis, conducted by a health  
46 economist using data from the ViP pilot study together with published data on rates of AME  
47 and medication review outcomes, indicating that \$1.54 could be saved for every \$1 spent on  
48 the ViP clinical pharmacy model.<sup>35</sup> Savings were from reduced medication use, GP  
49 visits/consultations, hospitalisations and nurse visits. Further work is required to confirm the  
50 model is cost-effective and identify a sustainable funding model.  
51  
52  
53  
54  
55  
56  
57  
58  
59  
60

## Conclusion

Using co-design and participatory action research, a collaborative, person-centred clinical pharmacy model for the home nursing setting was developed to address the needs of clients, carers, nurses and other stakeholders. The model is likely to have applicability to community nursing services nationally and internationally.

For peer review only

**Table 1. Key medication management issues affecting home nursing clients, identified by stakeholders and review of client data**

- 
- High prevalence of polypharmacy (5 or more medicines)
  - Complex medication regimens sometimes necessitating multiple daily nurse home visits
  - High prevalence of medication errors and other medication-related problems
  - Difficulty obtaining, and maintaining, up-to-date medication treatment authorisations<sup>^</sup> from prescribers
  - Discrepancies between medication treatment authorisations and client's medicines (including pharmacy-packed dose administration aids)
  - Lack of communication and sharing of medication information between prescribers, community pharmacies and community nurses
  - Lack of clinical pharmacy support and access to medicines information and advice for community nurses
  - Poor client access to community pharmacists due to poor mobility
  - Very low rate of HMR, despite nurses' efforts to organise them through clients' GPs (due to barriers such as low GP acceptances of nurses' recommendations, and HMR requirements that: a) require GPs obtain client consent then initiate a pharmacist referral, b) do not allow community nurses to directly refer clients to an HMR pharmacist, and c) restrict the frequency of HMR)
  - Lack of involvement of community nurses when a HMR occurs (nurses not informed when review occurs, not consulted about the client's medication management, and not provided with a copy of the HMR report or updated medication orders)
- 

GP =General Practitioner; HMR = Home Medicines Review (Australian Government-funded, GP-initiated pharmacist medication review programme)

<sup>^</sup> Medication treatment authorisations are signed orders from a medical practitioner authorising the nurse to administer medicines or support clients' medicine self-administration.



**Table 2. Clinical pharmacist roles**

| <b>Direct client care</b>                                                                                                                                                                                                                                                                                                                                                                                                                                                                                                                                                                                                                                                                                                                                                                                                                                                                                                                                                                                                                                                                                                       | <b>Indirect client care</b>                                                                                                                                                                                                                                                                                                                                                    |
|---------------------------------------------------------------------------------------------------------------------------------------------------------------------------------------------------------------------------------------------------------------------------------------------------------------------------------------------------------------------------------------------------------------------------------------------------------------------------------------------------------------------------------------------------------------------------------------------------------------------------------------------------------------------------------------------------------------------------------------------------------------------------------------------------------------------------------------------------------------------------------------------------------------------------------------------------------------------------------------------------------------------------------------------------------------------------------------------------------------------------------|--------------------------------------------------------------------------------------------------------------------------------------------------------------------------------------------------------------------------------------------------------------------------------------------------------------------------------------------------------------------------------|
| <ul style="list-style-type: none"> <li>• Visiting clients in their homes (with the community nurse where practical) to review and discuss medicines management, identify medication-related problems and educate clients/carers on their medicines use;</li> <li>• Obtaining ‘best-possible medication histories’ (current medication list, verified using two or more sources);</li> <li>• Reconciling the best-possible medication history with current medication orders held by the home nursing service to identify and resolve discrepancies;</li> <li>• Working with clients’ prescribers and community pharmacies to resolve medication-related problems, withdraw (deprescribe) unnecessary or inappropriate medicines and simplify medication regimens;</li> <li>• Liaising with prescribers and community pharmacies to update clients’ medicines lists and community nurses’ medication treatment authorisations^;</li> <li>• Providing advice to community nurses to optimise clients’ medication management plans;</li> <li>• Answering client-specific medicines information questions from community</li> </ul> | <ul style="list-style-type: none"> <li>• Answering general medicines information questions from nurses</li> <li>• Providing nurse education regarding medicines and medication management</li> <li>• Developing medication information resources for nurses</li> <li>• Contributing to development or revision of organisational medication policies and procedures</li> </ul> |

---

nurses and others;

- Following-up clients and/or community nurses, GPs, community pharmacies to ensure positive outcomes from medicine reviews (via telephone and/or repeat home visits where necessary).

---

<sup>^</sup> Medication treatment authorisations are signed orders from a medical practitioner authorising the nurse to administer medicines or support clients' medicine self-administration.

**Table 3: Key differences between the home nursing clinical pharmacy model and the Australian Home Medicines Review (HMR) model\***

| <b>Components</b>                                                | <b>Home nursing clinical pharmacy model</b>                                                                                                            | <b>Home Medicines Review model*</b>                                                                  |
|------------------------------------------------------------------|--------------------------------------------------------------------------------------------------------------------------------------------------------|------------------------------------------------------------------------------------------------------|
| Referral to pharmacist                                           | Direct referral by community nurses                                                                                                                    | Requires nurse to request client's GP make a referral                                                |
| Likelihood of pharmacist review following nurse referral/request | High                                                                                                                                                   | Low <sup>#</sup>                                                                                     |
| Timeliness of pharmacist review                                  | Rapid                                                                                                                                                  | Slow <sup>#</sup>                                                                                    |
| Home visit process                                               | Home visit by the clinical pharmacist alongside community nurse                                                                                        | Home visit by the clinical pharmacist alone                                                          |
| Medication review                                                | Addresses the medication management and information needs of the community nurse <sup>^</sup> as well as the client/carer, GP and community pharmacist | Does not address the medication management and information needs of the community nurse <sup>^</sup> |
| Medication review report                                         | Copy provided to GP, community pharmacy and community nurse                                                                                            | Copy not provided to community nurse                                                                 |
| GP remuneration                                                  | No remuneration other than for standard patient consultations or other Government-funded items including case conference with pharmacist and nurse     | GP remunerated for initiating the HMR and preparing a medication management plan                     |
| Post-medication review follow-up and support                     | Follow up and ongoing support for clients, carers, community nurses and other health providers to ensure medication issues are resolved                | No follow-up or ongoing medication management support available from the clinical pharmacist.        |
| Ad hoc advice about clients' medication management               | Community nurses able to contact clinical pharmacist at any time for advice                                                                            | Not available                                                                                        |
| Indirect care                                                    | As summarised in Table 2.                                                                                                                              | Not available                                                                                        |

GP = General Practitioner

\* Home Medicines Review (HMR): Australian Government funded pharmacist medication review program

1  
2  
3 # Low uptake of HMR due to poor acceptance of community nurse requests for an HMR and programme  
4 restrictions on frequency of HMR; Delays due to need for GP to see the patient to obtain consent, then make  
5 referral to an HMR pharmacist  
6

7 ^ Information needs of community nurses may include: Assistance with clarifying ambiguous or complex  
8 medication treatment authorisations and addressing discrepancies with clients' medicines; Targeted regimen  
9 simplification (where appropriate) to minimise home nursing visits; Assistance with sourcing updated  
10 medication treatment authorisations; Advice about medicines storage and administration; Advice about  
11 monitoring medication outcomes and adverse effects.  
12  
13  
14  
15  
16  
17  
18  
19  
20  
21  
22  
23  
24  
25  
26  
27  
28  
29  
30  
31  
32  
33  
34  
35  
36  
37  
38  
39  
40  
41  
42  
43  
44  
45  
46  
47  
48  
49  
50  
51  
52  
53  
54  
55  
56  
57  
58  
59  
60

For peer review only

**Table 4. Medication-related risk factors and problems that could trigger a pharmacist referral**

- 
- $\geq 8$  medicines
  - $\geq 1$  high or moderate risk medicines<sup>#</sup>
  - $> 1$  prescriber or pharmacy
  - $> 1$  medication treatment authorisations<sup>^</sup>
  - Discharged from hospital in the past month
  - Experiencing possible medicine side effects
  - Recent medication error or incident
  - Client or carer concerns about their medicines
  - Nurse concerns about medication regimen (e.g. potentially inappropriate medicines, unclear/ambiguous medication orders, complex dosing regimen)
- 

<sup>#</sup> High risk medicines: anticoagulants, chemotherapeutic agents excluding hormonal agents, immunosuppressant agents, insulins, levodopa, lithium, opiates; Moderate risk medicines: anticonvulsants, anti-infectives excluding topical agents, antipsychotics, benzodiazepines, digoxin, loop diuretics, oral hypoglycaemics, oral corticosteroids.

<sup>^</sup> Medication treatment authorisations are signed orders from a medical practitioner authorising the nurse to administer medicines or support clients' medicine self-administration. Clients sometimes have multiple authorisations (e.g. a general practitioner [GP]-provided medicine list plus one or more letters from the GP, specialist or other prescriber indicating a medicine change).

## REFERENCES

1. Elliott RA, Lee CY, Beanland C, et al. Medicines management, medication errors and adverse medication events in older people referred to a community nursing service: a retrospective observational study. *Drugs - Real World Outcomes* 2016;**3**(1):13-24.
2. Griffiths R, Johnson M, Piper M, et al. A nursing intervention for the quality use of medicines by elderly community clients. *Int J Nurs Pract* 2004;**10**(4):166-76.
3. Johnson M, Griffiths R, Piper M, et al. Risk factors for an untoward medication event among elders in community-based nursing caseloads in Australia. *Public Health Nursing* 2005;**22**(1):36-44.
4. Meredith S, Feldman PH, Frey D, et al. Possible medication errors in home healthcare patients. *J Am Geriatr Soc* 2001;**49**(6):719-24.
5. Ellenbecker CH, Frazier SC, Verney S. Nurses' observations and experiences of problems and adverse effects of medication management in home care. *Geriatr Nurs* 2004;**25**(3):164-70.
6. Ellenbecker CH, Samia L, Cushman MJ, et al. Chapter 13: Patient Safety and Quality in Home Health Care. In: Hughes RG, ed. *Patient Safety and Quality: An Evidence-Based Handbook for Nurses*. Rockville MD, 2008.
7. Code of Federal Regulations 484.55 - Condition of participation: Comprehensive assessment of patients. <https://www.law.cornell.edu/cfr/text/42/484.55>.
8. Lee CY, Beanland C, Goeman D, et al. Evaluation of a support worker role, within a nurse delegation and supervision model, for provision of medicines support for older people living at home: the Workforce Innovation for Safe and Effective (WISE) Medicines Care study. *BMC Health Serv Res* 2015;**15**:460.
9. Clark JA, Gates BJ, McKeirnan KC, et al. Assessed value of consultant pharmacist services in a home health care agency. *Consultant Pharmacist* 2016;**31**(3):161-7.
10. Australian Medical Association (AMA). *General Practice Pharmacists - Improving patient care. A proposal from the AMA for the Commonwealth Government to establish a funding program to integrate non-dispensing pharmacists within general practices*, AMA, ACT, 2015. [https://ama.com.au/system/tdf/documents/Pharmacists\\_in\\_General\\_Practice\\_Proposal.pdf?file=1&type=node&id=42083](https://ama.com.au/system/tdf/documents/Pharmacists_in_General_Practice_Proposal.pdf?file=1&type=node&id=42083).
11. Deloitte Access Economics (DAE). *Analysis of non-dispensing pharmacists in general practice clinics*. Prepared by DAE for Australian Medical Association, DAE, ACT, 2015. <http://www.deloitteaccesseconomics.com.au/uploads/File/deloitte-au-economics-analysis-non-dispensing-pharmacists-general-practice-clinics-010415.pdf>.
12. Mekonnen AB, McLachlan AJ, Brien JA. Effectiveness of pharmacist-led medication reconciliation programmes on clinical outcomes at hospital transitions: a systematic review and meta-analysis. *BMJ Open* 2016;**6**(2):e010003.
13. Pevnick JM, Shane R, Schnipper JL. The problem with medication reconciliation. *BMJ Qual Safety* 2016;**25**(9):726-30.
14. Jokanovic N, Tan EC, van den Bosch D, et al. Clinical medication review in Australia: a systematic review. *Res Social Admin Pharm* 2016;**12**(3):384-418.
15. Gillespie U, Alassaad A, Henrohn D, et al. A comprehensive pharmacist intervention to reduce morbidity in patients 80 years or older: a randomized controlled trial. *Arch Intern Med* 2009;**169**(9):894-900.
16. Dooley MJ, Allen KM, Doecke CJ, et al. A prospective multicentre study of pharmacist initiated changes to drug therapy and patient management in acute care government funded hospitals. *Br J Clin Pharmacol* 2004;**57**(4):513-21.

17. The Society of Hospital Pharmacists of Australia (SHPA) Committee of Specialty Practice in Clinical Pharmacy. SHPA Standards of Practice for Clinical Pharmacy. *J Pharm Pract Res* 2005;**35**(2):122-48.
18. The Pharmacy Guild of Australia. 6th Community Pharmacy Agreement: Home Medicines Review (HMR) - Programme specific guidelines. The Pharmacy Guild of Australia and the Australian Government Department of Health, ACT, Australia, 2015. <http://6cpa.com.au/medication-management-programs/home-medicines-review/>.
19. Lee CY, George J, Elliott RA, et al. Exploring stakeholder perspectives on medication review services for older residents in retirement villages. *Int J Pharm Pract* 2012;**20**(4):249-58.
20. Kyle G, Nissen L. A community nurse referral system for Home Medicines Reviews - can it work? *Aust Pharm* 2006;**25**(4):326-31.
21. Elliott RA, Martinac G, Campbell S, et al. Pharmacist-led medication review to identify medication-related problems in older people referred to an Aged Care Assessment Team: a randomized comparative study. *Drugs Aging* 2012;**29**(7):593-605.
22. Lee CY, George J, Elliott R, et al. Exploring medication risk among older residents in supported residential services: a cross-sectional study. *J Pharm Pract Res* 2011;**41**(2):98-101.
23. Elliott RA, Lee CY. Poor uptake of interdisciplinary medicine reviews for older people is a barrier to deprescribing. *BMJ* 2016;**353**:i3496.
24. Goeman D, King J, Koch S. Development of a model of dementia support and pathway for culturally and linguistically diverse communities using co-creation and participatory action research. *BMJ Open* 2016;**6**(12):e013064.
25. Meyer J. Action Research. In: Pope C, Mays N, eds. *Qualitative Research in Health Care*. 3rd ed. MA: Blackwell Publishing, 2006:121-31.
26. Australian Pharmaceutical Advisory Council (APAC). Guiding principles for medication management in the community. Commonwealth of Australia, ACT, Australia, 2006. <http://www.health.gov.au/internet/main/publishing.nsf/Content/apac-publications-guiding>.
27. Epping-Jordan JE, Pruitt SD, Bengoa R, et al. Improving the quality of health care for chronic conditions. *Quality & Safety In Health Care* 2004;**13**(4):299-305.
28. Jokanovic N, Tan EC, Sudhakaran S, et al. Pharmacist-led medication review in community settings: An overview of systematic reviews. *Res Soc Admin Pharm* 2017;**13**(4):661-85.
29. Reidt S, Morgan J, Larson T, et al. The role of a pharmacist on the home care team: a collaborative model between a college of pharmacy and a visiting nurse agency. *Home Healthcare Nurse* 2013;**31**(2):80-7.
30. Elliott RA, Booth JC. Problems with medicine use in older Australians: a review of recent literature. *Journal of Pharmacy Practice and Research* 2014;**44**:258-71.
31. Vink J, Morton D, Ferreri S. Pharmacist identification of medication-related problems in the home care setting. *Consultant Pharmacist* 2011;**26**(7):477-84.
32. Reidt SL, Larson TA, Hadsall RS, et al. Integrating a pharmacist into a home healthcare agency care model: impact on hospitalizations and emergency visits. *Home Healthcare Nurse* 2014;**32**(3):146-52.
33. Cooper JW, Jr., Griffin DL, Francisco GE, et al. Home health care: drug-related problems detected by consultant pharmacist participation. *Hospital Formulary* 1985;**20**(5):643-5, 48-50.
34. Dilks S, Emblin K, Nash I, et al. Pharmacy at home: service for frail older patients demonstrates medicines risk reduction and admission avoidance. *Clinical Pharmacist* 2016;**8**(7).

- 1  
2  
3 35. Mortimer D. Return on investment for RDNS-Visiting Pharmacist (ViP) service versus  
4 Home Medicine Reivew (HMR) service from a health system perspective. Final  
5 report prepared by Monash University Centre for Health Economics (CHE) for Royal  
6 District Nursing Service (RDNS). Monash University CHE and RDNS, Melbourne,  
7 Australia. September 2016. (unpublished)  
8  
9  
10  
11  
12  
13  
14  
15  
16  
17  
18  
19  
20  
21  
22  
23  
24  
25  
26  
27  
28  
29  
30  
31  
32  
33  
34  
35  
36  
37  
38  
39  
40  
41  
42  
43  
44  
45  
46  
47  
48  
49  
50  
51  
52  
53  
54  
55  
56  
57  
58  
59  
60

For peer review only
